# Supplementary material for: Pentacyclic coumarin-based blue emitters – the case of bifunctional nucleophilic behavior of amidines
Source: Royal Society of Chemistry journal article supplement (doi:10.1039/c4cc01106f), 2014-01-01
Supplement: c4cc01106f1.pdf [file c4cc01106f1.pdf]

Supporting information

## Pentacyclic coumarin-based blue emitters - the case of bifunctional nucleophilic behavior of amidines

Y. M. Poronik and D. T. Gryko\*

*Institute of Organic Chemistry PAS, Kasprzaka 44/52, 01-224 Warsaw, Poland*

E-mail: dtgryko@icho.edu.pl

### Table of Contents

|                                                                           |     |
|---------------------------------------------------------------------------|-----|
| Instrumentation and Materials .....                                       | S1  |
| Experimental Details .....                                                | S1  |
| Proposed reaction mechanism for the formation of compound <b>3a</b> ..... | S7  |
| Crystal packing for compound <b>3a</b> .....                              | S7  |
| <sup>1</sup> H and <sup>13</sup> C NMR Spectra .....                      | S8  |
| UV/Vis absorption and fluorescence spectra .....                          | S31 |

### Instrumentation and Materials

All chemicals were used as received unless otherwise noted. All reported <sup>1</sup>H NMR spectra were collected using 500 MHz spectrometers. Chemical shifts ( $\delta$  ppm) were determined with TMS as the internal reference; *J* values are given in Hz. Chromatography was performed on silicagel (230-400 mesh). Preparative thin layer chromatography (TLC) was carried out using Merck PLC Silica gel 60 F<sub>254</sub> 1 mm plates. The mass spectra were obtained via electron ionisation (EI-MS) or electrospray ionization (ESI-MS). All photophysical studies have been performed with freshly-prepared air-equilibrated solutions at room temperature (298 K).

A Perkin-Elmer Lambda 25 UV/Vis spectrophotometer and a Hitachi F7000 fluorescence spectrometer were used to acquire the absorption and emission spectra. Spectrophotometric grade solvents were used without further purification. Fluorescence quantum yields were determined in DMSO and in CH<sub>2</sub>Cl<sub>2</sub> using 9,10-diphenylanthracene in cyclohexane (**4a,b,c,e**) and quinine sulfate in 0.05 M H<sub>2</sub>SO<sub>4</sub> (**3d** and **4d**) as standards.

### Experimental part

### General procedure for the preparation of compounds 3a-e and 4a-e.

3-Alkoxy carbonyl coumarin **2a-e** (1 mmol) and amidine base **1a,b** (0.5 mmol) were heated at 120-130°C for 2 hr (**1**) or 30 min (**2**). On cooling the reaction was subsequently washed with diethyl ether, *i*-PrOH and filtered.

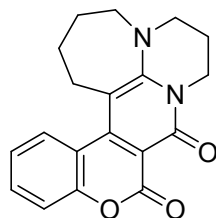

**3a**

The crude product was recrystallized from EtOH. Yield 75%. M.p. 307-308°C(dec.)

<sup>1</sup>H NMR (CDCl<sub>3</sub>): δ 7.89 (dd, *J* = 8.5, 1.0 Hz, 1H), 7.45 (t, *J* = 8.0 Hz, 1H), 7.24-7.28 (m, 1H), 7.15 (t, *J* = 7.5 Hz, 1H), 4.21 (br. s, 2H), 3.68 (br. s, 2H), 3.42 (t, *J* = 6.5 Hz, 2H), 2.99 (br. s, 2H), 2.10 (quin, *J* = 6.0 Hz, 2H), 1.97-2.03 (m, 2H), 1.87-1.93 (m, 2H) ppm; <sup>13</sup>C NMR (CDCl<sub>3</sub>): δ 158.4, 158.3, 155.2, 153.8, 150.4, 131.7, 128.8, 122.4, 118.2, 117.7, 98.5, 97.9, 49.4, 38.9, 31.3, 24.8, 24.7, 22.6 ppm; HRMS (EI) calcd for C<sub>19</sub>H<sub>18</sub>N<sub>2</sub>O<sub>3</sub>: 322.1317 [M<sup>+</sup>], found: 322.1317; Anal. Calcd. for C<sub>19</sub>H<sub>18</sub>N<sub>2</sub>O<sub>3</sub> (322.36): C, 70.79; H, 5.63; N, 8.69; Found: C, 70.54; H, 5.74; N, 8.57; λ<sub>abs</sub> (DCM, ε × 10<sup>-3</sup>) 413 (16.2), 278 (21.3) nm.

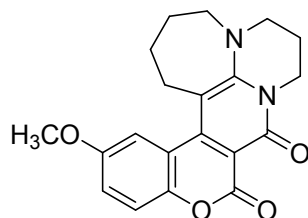

**3b**

The crude product was recrystallized from EtOH. Yield 68%. M.p. 320-321°C(dec.)

<sup>1</sup>H NMR (CDCl<sub>3</sub>): δ 7.36 (d, *J* = 2.7 Hz, 1H), 7.19 (d, *J* = 9.2 Hz, 1H), 7.04 (dd, *J* = 8.9, 2.8 Hz, 1H), 4.21 (br. s, 2H), 3.83 (s, 3H), 3.68 (br. s, 2H), 3.43 (t, *J* = 6.4 Hz, 2H), 3.00 (br. s, 2H), 2.10 (quin, *J* = 5.8 Hz, 2H), 2.01 (quin, *J* = 5.8 Hz, 2H), 1.90 (quin, *J* = 5.5 Hz, 2H) ppm; <sup>13</sup>C NMR (CDCl<sub>3</sub>): δ 158.7, 158.5, 155.3, 154.4, 150.1, 148.0, 118.4, 118.3, 112.9, 98.4, 98.0, 55.9, 53.1, 49.5, 39.1, 31.2, 24.8, 22.6 ppm; HRMS (EI) calcd for C<sub>20</sub>H<sub>20</sub>N<sub>2</sub>O<sub>4</sub>: 352.1423 [M<sup>+</sup>], found: 352.1426; Anal. Calcd. for C<sub>20</sub>H<sub>20</sub>N<sub>2</sub>O<sub>4</sub> (352.38): C, 68.17; H, 5.72; N, 7.95; Found: C, 67.97; H, 5.84; N, 8.10; λ<sub>abs</sub> (DCM, ε × 10<sup>-3</sup>) 415 (16.3), 277 (20.6) nm.

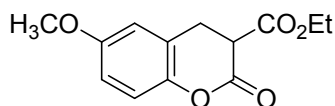

**Ethyl 6-methoxy-2-oxochroman-3-carboxylate, 5b**

The diethyl ether solution from the previous step was evaporated and the product was purified by the preparative TLC to yield 0.02 g (8%) of reduced coumarin **5b**. M.p. 93-94°C

$^1\text{H}$  NMR ( $\text{CDCl}_3$ ):  $\delta$  6.99 (d,  $J = 8.9$  Hz, 1H), 6.79 (dd,  $J = 8.9, 2.9$  Hz, 1H), 6.72 (d,  $J = 2.7$  Hz, 1H), 4.15-4.26 (m, 2H), 3.78 (s, 3H), 3.73 (dd,  $J = 8.4, 6.0$  Hz, 1H), 3.37 (dd,  $J = 16.0, 8.5$  Hz, 1H), 3.13 (dd,  $J = 16.0, 6.0$  Hz, 1H), 1.22 (t,  $J = 7.2$  Hz, 2H) ppm;  $^{13}\text{C}$  NMR ( $\text{CDCl}_3$ ):  $\delta$  167.5, 164.9, 156.4, 145.3, 121.7, 117.6, 113.8, 113.3, 62.1, 55.7, 46.3, 31.6, 27.6, 22.6, 13.9 ppm; HRMS (EI) calcd for  $\text{C}_{13}\text{H}_{14}\text{O}_5$ : 250.0841 [ $\text{M}^+$ ], found: 250.0846.

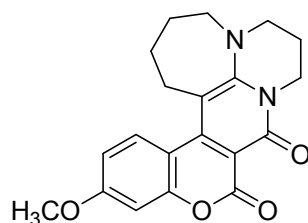

**3c**

The crude product was recrystallized from EtOH. Yield 51%. M.p. 280-281°C

$^1\text{H}$  NMR ( $\text{CDCl}_3$ ):  $\delta$  7.79 (d,  $J = 9.8$  Hz, 1H), 6.70-6.74 (m, 2H), 4.19 (br. s, 2H), 3.84 (s, 3H), 3.66 (br. s, 2H), 3.41 (t,  $J = 6.5$  Hz, 2H), 2.95 (br. s, 2H), 2.08 (quin,  $J = 6.0$  Hz, 2H), 2.00 (quin,  $J = 5.7$  Hz, 2H), 1.90 (quin,  $J = 5.4$  Hz, 2H) ppm;  $^{13}\text{C}$  NMR ( $\text{CDCl}_3$ ):  $\delta$  162.2, 158.6, 158.5, 155.6, 155.0, 150.3, 130.0, 111.1, 110.6, 100.9, 97.2, 97.1, 55.6, 52.5, 49.2, 38.8, 31.3, 24.7, 22.6 ppm; HRMS (EI) calcd for  $\text{C}_{20}\text{H}_{20}\text{N}_2\text{O}_4$ : 352.1423 [ $\text{M}^+$ ], found: 352.1425; Anal. Calcd. for  $\text{C}_{20}\text{H}_{20}\text{N}_2\text{O}_4$  (352.38): C, 68.17; H, 5.72; N, 7.95; Found: C, 67.96; H, 5.61; N, 7.81;  $\lambda_{\text{abs}}$  (DCM,  $\epsilon \times 10^{-3}$ ) 404 (19.6), 329 (12.9), 228 (22.5) nm.

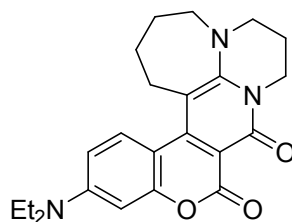

### 3d

The crude product was recrystallized from EtOH. Yield 61%. M.p. 247-248°C

$^1\text{H}$  NMR ( $\text{CDCl}_3$ ):  $\delta$  7.70 (d,  $J = 9.1$  Hz, 1H), 6.40-6.55 (m, 2H), 4.16 (br. s, 2H), 3.62 (br. s, 2H), 3.33-3.45 (m, 6H), 2.94 (br. s, 2H), 2.05 (br. s, 2H), 1.97 (br. s, 2H), 1.85 (br. s, 2H), 1.19 (t,  $J = 6.9$  Hz, 6H) ppm;  $^{13}\text{C}$  NMR ( $\text{CDCl}_3$ ):  $\delta$  159.2, 158.8, 156.0, 154.5, 150.9, 150.0, 130.0, 107.0, 106.3, 98.1, 96.6, 96.5, 52.6, 49.1, 44.7, 38.6, 31.4, 24.9, 24.8, 22.8, 12.5 ppm; HRMS (EI) calcd for  $\text{C}_{23}\text{H}_{27}\text{N}_3\text{O}_3$ : 393.2052 [ $\text{M}^+$ ], found: 393.2059; Anal. Calcd. for  $\text{C}_{23}\text{H}_{27}\text{N}_3\text{O}_3$  (393.48): C, 70.21; H, 6.92; N, 10.68; Found: C, 69.96; H, 7.09; N, 10.67;  $\lambda_{\text{abs}}$  (DCM,  $\epsilon \times 10^{-3}$ ) 406 (37.1), 279 (19.7) nm.

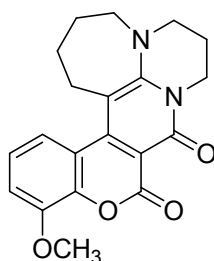

### 3e

The crude product was recrystallized from EtOH. Yield 68%. M.p. 310°C(dec.)

$^1\text{H}$  NMR ( $\text{CDCl}_3$ ):  $\delta$  7.44 (d,  $J = 8.0$  Hz, 1H), 7.07 (t,  $J = 8.2$  Hz, 1H), 7.01 (d,  $J = 7.2$  Hz, 1H), 4.21 (br. s, 2H), 3.92 (s, 3H), 3.68 (br. s, 2H), 3.42 (t,  $J = 6.4$  Hz, 2H), 2.96 (br. s, 2H), 2.10 (quin,  $J = 5.8$  Hz, 2H), 2.00 (br. s, 2H), 1.87 (br. s, 2H) ppm;  $^{13}\text{C}$  NMR ( $\text{CDCl}_3$ ):  $\delta$  158.4, 157.8, 155.2, 150.5, 147.9, 143.9, 121.7, 120.1, 118.7, 113.3, 98.4, 98.3, 56.2, 52.7, 49.4, 39.0, 31.3, 24.7, 22.6 ppm; HRMS (EI) calcd for  $\text{C}_{20}\text{H}_{20}\text{N}_2\text{O}_4$ : 352.1423 [ $\text{M}^+$ ], found: 352.1424; Anal. Calcd. for  $\text{C}_{20}\text{H}_{20}\text{N}_2\text{O}_4$  (352.38): C, 68.17; H, 5.72; N, 7.95; Found: C, 67.96; H, 5.68; N, 7.99;  $\lambda_{\text{abs}}$  (DCM,  $\epsilon \times 10^{-3}$ ) 411 (17.3), 282 (27.6) nm.

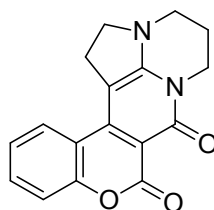

### 4a

The crude product was recrystallized from CH<sub>3</sub>CN. Yield 71%. M.p. 383°C(dec.)

<sup>1</sup>H NMR (CF<sub>3</sub>COOD):  $\delta$  7.93 (d,  $J$  = 8.2 Hz, 1H), 7.71 (t,  $J$  = 8.2 Hz, 1H), 7.50 (t,  $J$  = 7.9 Hz, 1H), 7.42 (d,  $J$  = 8.5 Hz, 1H), 4.30 (t,  $J$  = 6.0 Hz, 2H), 4.21 (t,  $J$  = 8.2 Hz, 2H), 3.61-3.67 (m, 4H), 2.39 (br. s, 2H) ppm; <sup>13</sup>C NMR (CF<sub>3</sub>COOD):  $\delta$  167.4, 162.4, 155.4, 151.4, 137.1, 134.5, 126.9, 126.7, 118.2, 110.80, 88.6, 52.6, 41.7, 40.8, 25.5, 17.6 ppm; HRMS (EI) calcd for C<sub>17</sub>H<sub>14</sub>N<sub>2</sub>O<sub>3</sub>: 294.1004 [M<sup>+</sup>], found: 294.1005; Anal. Calcd. for C<sub>17</sub>H<sub>14</sub>N<sub>2</sub>O<sub>3</sub> (294.30): C, 69.38; H, 4.79; N, 9.52; Found: C, 69.10; H, 4.80; N, 9.30;  $\lambda_{\text{abs}}$  (DCM,  $\epsilon \times 10^{-3}$ ) 411 (13.9), 392 (15.1), 294 (13.7), 276 (21.1), 267 (19.1) nm.

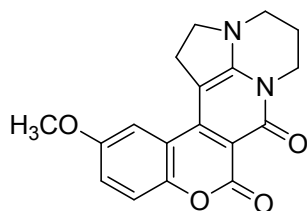

**4b**

The crude product was recrystallized from CH<sub>3</sub>CN. Yield 69%. M.p. 371°C(dec.)

<sup>1</sup>H NMR (CF<sub>3</sub>COOD):  $\delta$  7.50 (d,  $J$  = 2.7 Hz, 1H), 7.42 (d,  $J$  = 9.1 Hz, 1H), 7.37 (dd,  $J$  = 9.2, 2.5 Hz, 1H), 4.31 (t,  $J$  = 5.8 Hz, 2H), 4.23 (t,  $J$  = 8.2 Hz, 2H), 3.97 (s, 3H), 3.65-3.70 (m, 4H), 2.41 (quin,  $J$  = 5.7 Hz, 2H) ppm; <sup>13</sup>C NMR (CF<sub>3</sub>COOD):  $\delta$  169.7, 164.9, 159.3, 157.7, 148.4, 139.2, 122.4, 121.8, 118.6, 114.5, 113.4, 90.8, 57.8, 54.9, 44.1, 43.1, 27.8, 19.9 ppm; HRMS (EI) calcd for C<sub>18</sub>H<sub>16</sub>N<sub>2</sub>O<sub>4</sub>: 324.1110 [M<sup>+</sup>], found: 324.1113; Anal. Calcd. for C<sub>18</sub>H<sub>16</sub>N<sub>2</sub>O<sub>4</sub>·H<sub>2</sub>O (342.35): C, 63.15; H, 5.30; N, 8.18; Found: C, 62.89; H, 5.27; N, 8.16;  $\lambda_{\text{abs}}$  (DCM,  $\epsilon \times 10^{-3}$ ) 415 (13.6), 395 (14.9), 298 (12.0) nm.

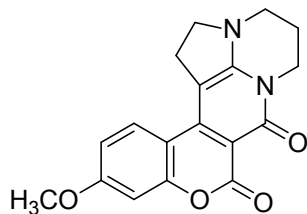

**4c**

The crude product was recrystallized from CH<sub>3</sub>CN. Yield 59%. M.p. 305-306°C(dec.)

<sup>1</sup>H NMR (CF<sub>3</sub>COOD):  $\delta$  7.84 (d,  $J$  = 9.1 Hz, 1H), 7.08 (dd,  $J$  = 9.0, 2.6 Hz, 1H), 6.95 (d,  $J$  = 2.5 Hz, 1H), 4.27 (t,  $J$  = 5.9 Hz, 2H), 4.17 (t,  $J$  = 8.2 Hz, 2H), 3.94 (s, 3H), 3.62 (t,  $J$  = 5.8 Hz, 2H), 3.57 (t,  $J$  =

8.5 Hz, 2H), 2.37 (quin,  $J = 5.8$  Hz, 2H) ppm;  $^{13}\text{C}$  NMR ( $\text{CF}_3\text{COOD}$ ):  $\delta$  169.8, 167.0, 164.8, 157.4, 155.6, 139.5, 130.6, 116.6, 111.1, 110.9, 104.8, 90.4, 57.4, 54.8, 44.0, 43.0, 27.7, 20.1 ppm; HRMS (EI) calcd for  $\text{C}_{18}\text{H}_{16}\text{N}_2\text{O}_4$ : 324.1110 [ $\text{M}^+$ ], found: 324.1115; Anal. Calcd. for  $\text{C}_{18}\text{H}_{16}\text{N}_2\text{O}_4 \cdot 0.25\text{H}_2\text{O}$  (328.83): C, 65.75; H, 5.06; N, 8.52; Found: C, 65.76; H, 5.10; N, 8.39;  $\lambda_{\text{abs}}$  (DCM,  $\varepsilon \times 10^{-3}$ ) 400 (18.8), 384 (18.8), 321 (14.5) nm.

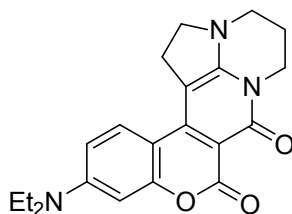

**4d**

The crude product was recrystallized from EtOH. Yield 60%. M.p. 305°C(dec.)

$^1\text{H}$  NMR ( $\text{DMSO-d}_6$ ,  $T = 323$  K):  $\delta$  7.62 (d,  $J = 9.0$  Hz, 1H), 6.56 (d,  $J = 8.3$  Hz, 1H), 6.31 (s, 1H), 3.69-3.82 (m, 4H), 3.39 (q,  $J = 6.8$  Hz, 4H), 3.29 (br. s, 2H), 3.22 (t,  $J = 7.9$  Hz, 2H), 2.03 (br. s, 2H), 1.13 (t,  $J = 6.6$  Hz, 6H) ppm;  $^{13}\text{C}$  NMR ( $\text{DMSO-d}_6$ ,  $T = 323$  K):  $\delta$  158.3, 157.4, 155.1, 155.0, 149.8, 141.2, 127.7, 107.4, 105.0, 96.8, 93.0, 88.2, 51.0, 43.6, 41.3, 36.8, 26.3, 19.1, 12.2 ppm; HRMS (EI) calcd for  $\text{C}_{21}\text{H}_{23}\text{N}_3\text{O}_3$ : 365.1739 [ $\text{M}^+$ ], found: 365.1748; Anal. Calcd. for  $\text{C}_{21}\text{H}_{23}\text{N}_3\text{O}_3 \cdot 0.2\text{H}_2\text{O}$  (369.03): C, 68.35; H, 6.39; N, 11.39; Found: C, 68.46; H, 6.32; N, 11.40;  $\lambda_{\text{abs}}$  (DCM,  $\varepsilon \times 10^{-3}$ ) 399 (38.6), 380 (30.7), 358 (31.9), 270 (15.6) nm.

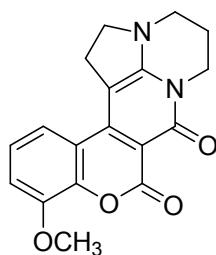

**4e**

The crude product was recrystallized from  $\text{CH}_3\text{CN}$ . Yield 76%. M.p. 383-384°C(dec.)

$^1\text{H}$  NMR ( $\text{CF}_3\text{COOD}$ ):  $\delta$  7.52 (d,  $J = 7.9$  Hz, 1H), 7.45 (t,  $J = 8.2$  Hz, 1H), 7.36 (d,  $J = 7.8$  Hz, 1H), 4.29 (t,  $J = 6.0$  Hz, 2H), 4.19 (t,  $J = 8.2$  Hz, 2H), 4.02 (s, 3H), 3.59-3.66 (m, 4H), 2.39 (quin,  $J = 5.8$  Hz, 2H) ppm;  $^{13}\text{C}$  NMR ( $\text{CF}_3\text{COOD}$ ):  $\delta$  169.0, 164.8, 157.8, 150.0, 143.5, 139.5, 128.9, 121.0, 119.0, 118.8, 113.7, 91.0, 58.2, 54.9, 44.1, 43.2, 27.9, 19.9 ppm; HRMS (EI) calcd for  $\text{C}_{18}\text{H}_{16}\text{N}_2\text{O}_4$ : 324.1110 [ $\text{M}^+$ ], found: 324.1109; Anal. Calcd. for  $\text{C}_{18}\text{H}_{16}\text{N}_2\text{O}_4 \cdot 0.2\text{H}_2\text{O}$  (327.93): C, 65.93; H, 5.04; N, 8.54; Found: C, 65.96; H, 5.00; N, 8.36;  $\lambda_{\text{abs}}$  (DCM,  $\varepsilon \times 10^{-3}$ ) 410 (15.2), 390 (16.2), 277 (28.4) nm.

**Scheme S1.** Proposed reaction mechanism for the oxidative cyclisation

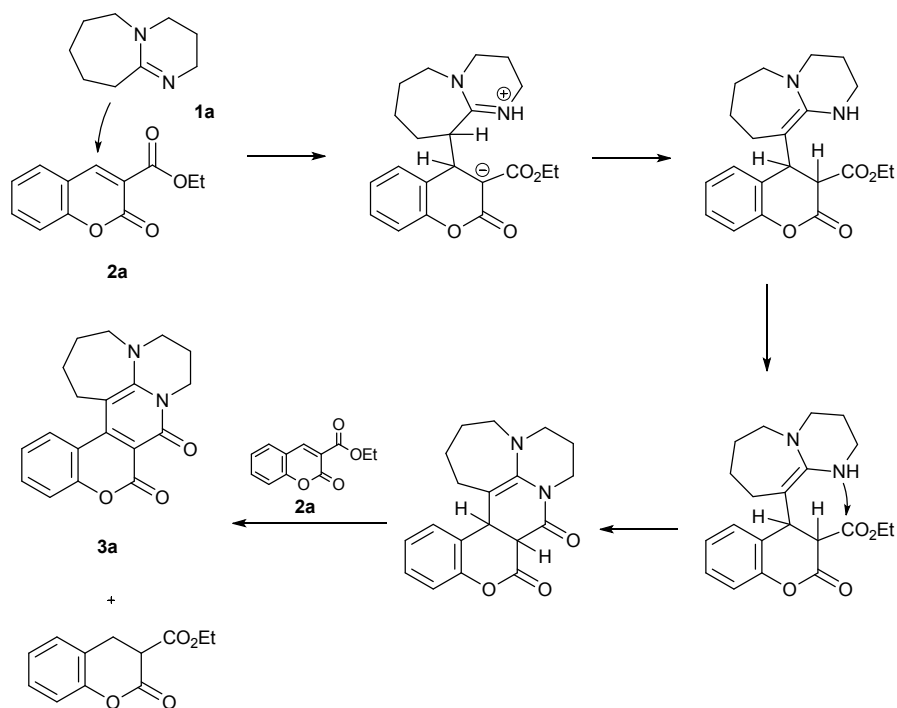

**Figure S1.** Crystal packing for compound **3a**.

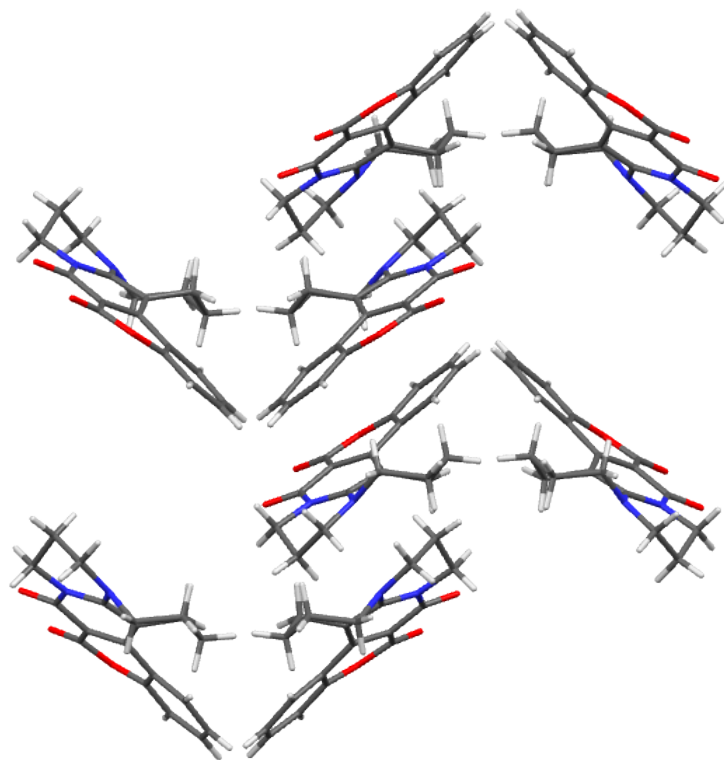

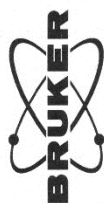

Current Data Parameters  
NAME ZEP114  
EXPNO 1  
PROCNO 1

F2 - Acquisition Parameters  
Date\_ 20131024  
Time 9.34  
INSTRUM DRX  
PROBHD 5 mm TBI JH/13  
PULPROG zgpg30  
SOLVENT CDCl3  
NS 32  
DS 0  
SWH 10330.578 Hz  
FIDRES 0.157632 Hz  
AQC 3.1719923 sec  
RG 456.1  
DW 46.078 usec  
TE 303.0 K  
D1 1.00000000 sec  
TD0 1

CHANNEL f1  
NUC1 JH  
P1 8.70 usec  
PL 0.00 dB  
SFO1 500.1330885 MHz

F2 - Processing parameters  
SI 32768  
SF 500.1300216 MHz  
WDW no  
SSB 0  
LB 0.00 Hz  
PC 1.00

1.229  
1.243  
1.258  
1.415  
1.628  
1.880  
1.891  
1.902  
2.003  
2.014  
2.026  
2.074  
2.087  
2.098  
2.110  
2.122  
2.994  
3.402  
3.415  
3.428  
3.678  
3.715  
3.729  
4.213

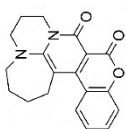

7.138  
7.140  
7.154  
7.169  
7.171  
7.251  
7.253  
7.263  
7.431  
7.433  
7.448  
7.462  
7.464  
7.478  
7.880  
7.895  
7.896  
8.520

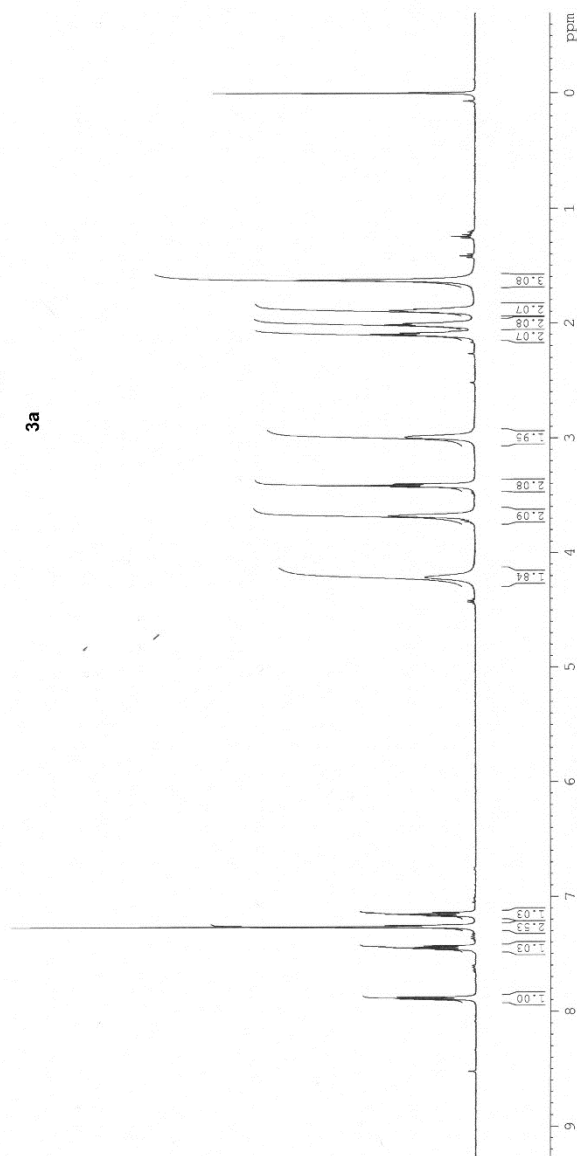



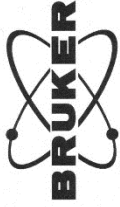

Current Data Parameters  
NAME ZEP114  
EXPNO 2  
PROCNO 1

F2 - Acquisition Parameters  
Date\_ 20131024  
Time 9.51  
INSTRUM DDX  
PROBHD 5 mm TBI 1H/13  
PULPROG zgpg30  
TD 65536  
SOLVENT CDCl3  
NS 8000  
DS 4  
SWH 32679.778 Hz  
FIDRES 0.498653 Hz  
AQ 1.0027508 sec  
RG 32768  
DW 15.300 usec  
DE 0.0000000 sec  
TE 303.1 K  
D1 1.00000000 sec  
d11 0.03000000 sec  
DELTA 0.89999999 sec  
LDO 1

==== CHANNEL F1 =====  
NUC1 13C  
P1 5.00 usec  
PL1 0.00 dB  
SFO1 125.7703633 MHz

==== CHANNEL F2 =====  
CPDPRG2 waltz16  
NUC2 13C  
PCPD2 98.00 usec  
PL2 3.00 dB  
PL12 23.00 dB  
PL13 32.00 dB  
SFO2 500.1320005 MHz

F1 - Acquisition parameters  
ND0 1  
TD 128  
SFO1 500.132 MHz  
FIDRES 7.145381 Hz  
SW 1.999 Ppm  
FIRMODE QF

F2 - Processing parameters  
SI 32768  
SF 125.7577935 MHz  
WDW EM  
SSB 0  
LB 0  
GB 0  
PC 1.40

F1 - Processing parameters  
SI 1024  
SF 500.1300000 MHz  
WDW SINE  
SSB 0  
LB 0  
GB 0.30 Hz  
0.1

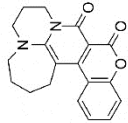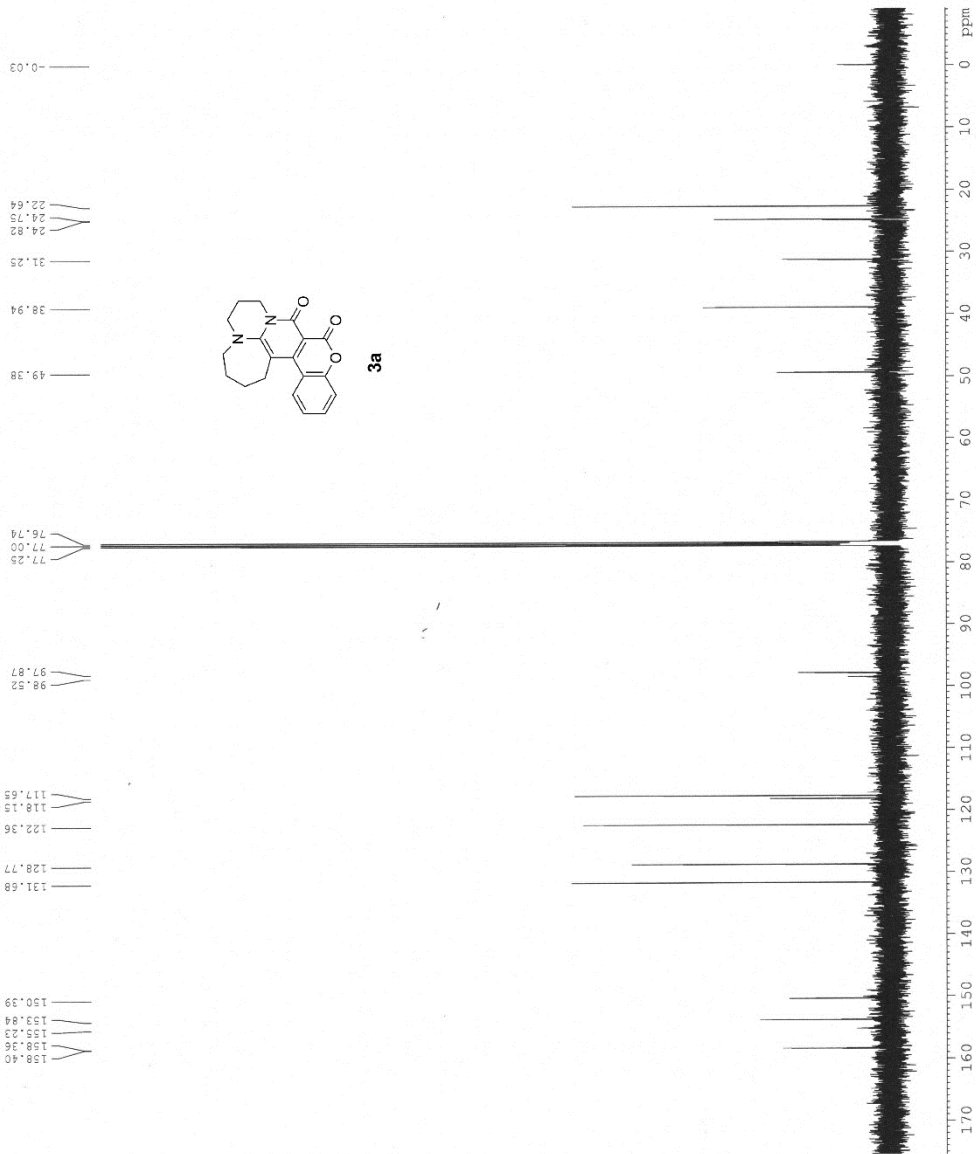

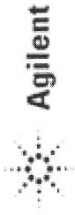

Y. Poronik

zesp10/Var500/ZEP\_127/ZEP\_127-H1

Sample Name:

ZEP\_127

Data Collected on:

Varian-NMR-vnmrs500

Archive directory:

Sample directory:

Fidfile: PROTON

Pulse Sequence: PROTON (s2pul)

Solvent: cdcl3

Data collected on: Nov 12 2013

Temp. 25.0 C / 298.1 K

Operator: vnmr1

Relax. delay 1.000 sec

Pulse 45.0 degrees

Acq. time 3.277 sec

Width 10000.0 Hz

32 repetitions

OBSERVE H1, 499.8247740 MHz

DATA PROCESSING

Ft size 65536

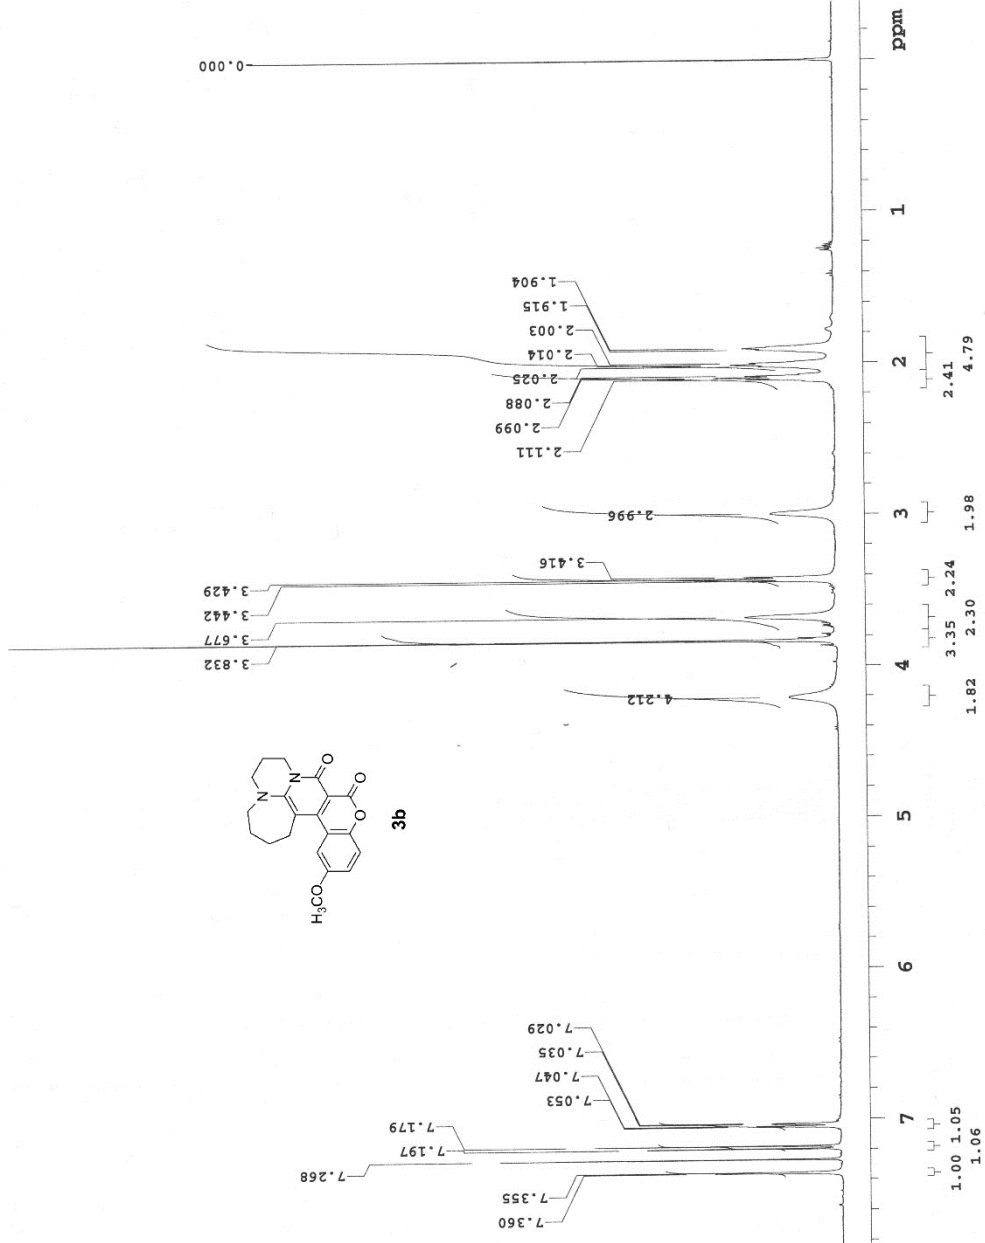

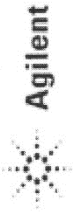

Y. Poronik  
zesp10/Var500/ZEP\_127/ZEP\_127-C1  
3

Sample Name: ZEP\_127  
Data Collected on: Varian-NMR-vnmrs500  
Archive directory:  
Sample directory:  
FidFile: CARBON  
Pulse Sequence: CARBON (s2pul)  
Solvent: cdcl3  
Data collected on: Nov 12 2013  
Temp. 25.0 C / 298.1 K  
Operator: vnmr1  
Relax. delay 0.500 sec  
Pulse 30.0 degrees  
Acq. time 1.200 sec  
Width 37878.8 Hz  
3216 repetitions  
OBSERVE C13, 125.6810405 MHz  
DECOUPLE H1, 499.8272777 MHz  
Power 38 dB  
continuously on  
WALTZ-16 modulated  
DATA PROCESSING  
Line broadening 3.0 Hz  
Ft size 131072

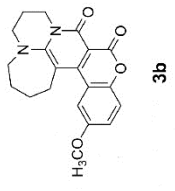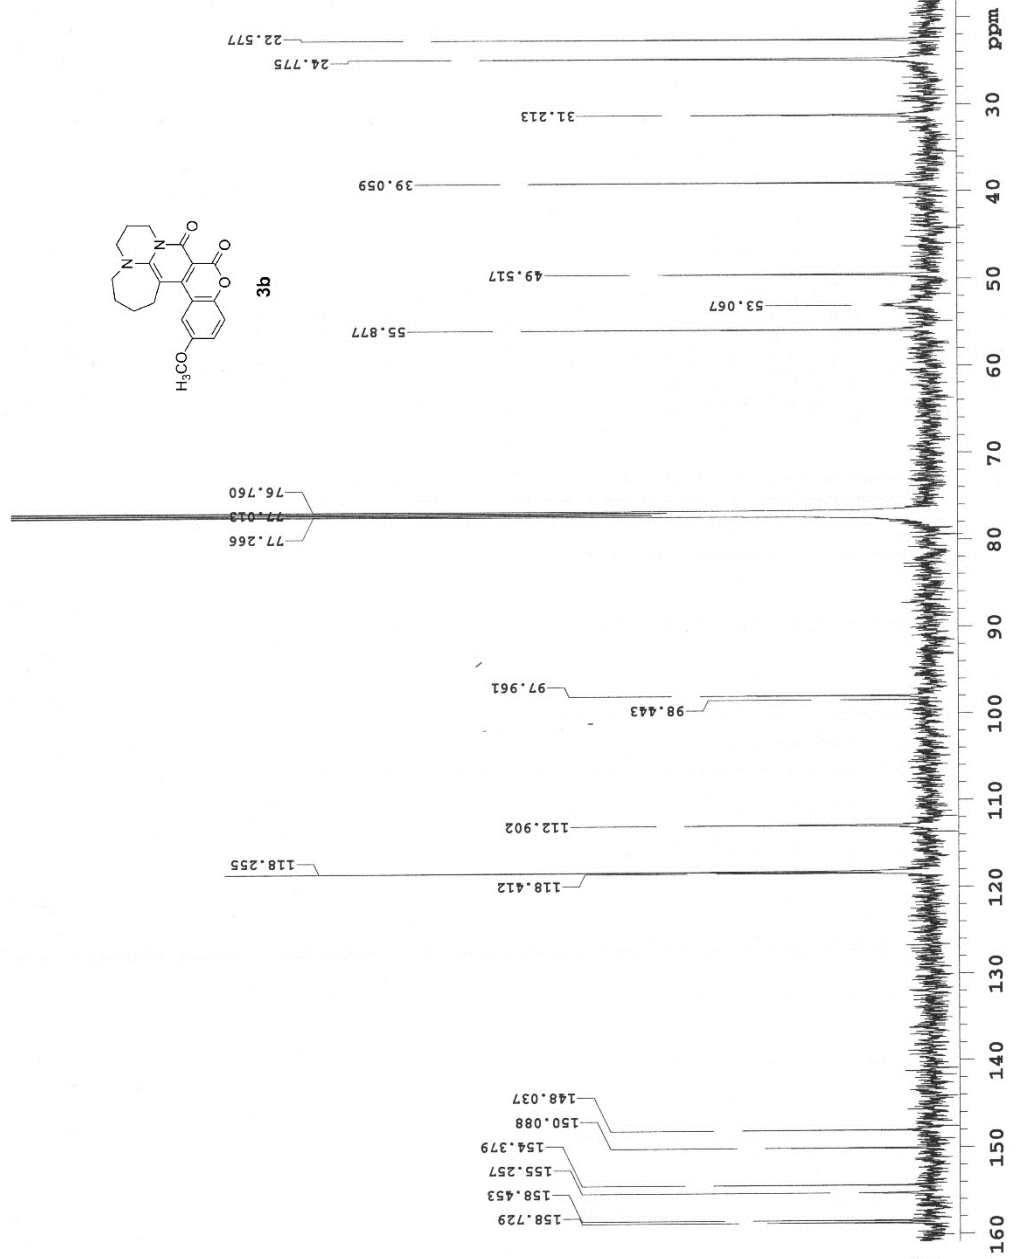

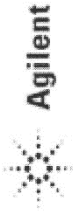

Yevgen Foronik  
zesp10/Var500/YP-2EP123/YP-2EP12  
3-H1

Sample Name:  
YP-2EP123  
Data Collected on:  
Varian-NMR-vnmrs500  
Archive directory:

Sample directory:  
FidFile: PROTON

Pulse Sequence: PROTON (s2pul)  
Solvent: CDCl3  
Data collected on: Nov 14 2013

Temp. 25.0 C / 298.1 K  
Operator: vnmr1

Relax. delay 1.000 sec  
Pulse 45.0 degrees  
Acq. time 5.924 sec  
Width 11061.9 Hz  
64 repetitions  
OBSERVE H1, 499.8247729 MHz  
DATA PROCESSING  
Ft size 131072

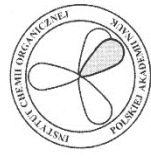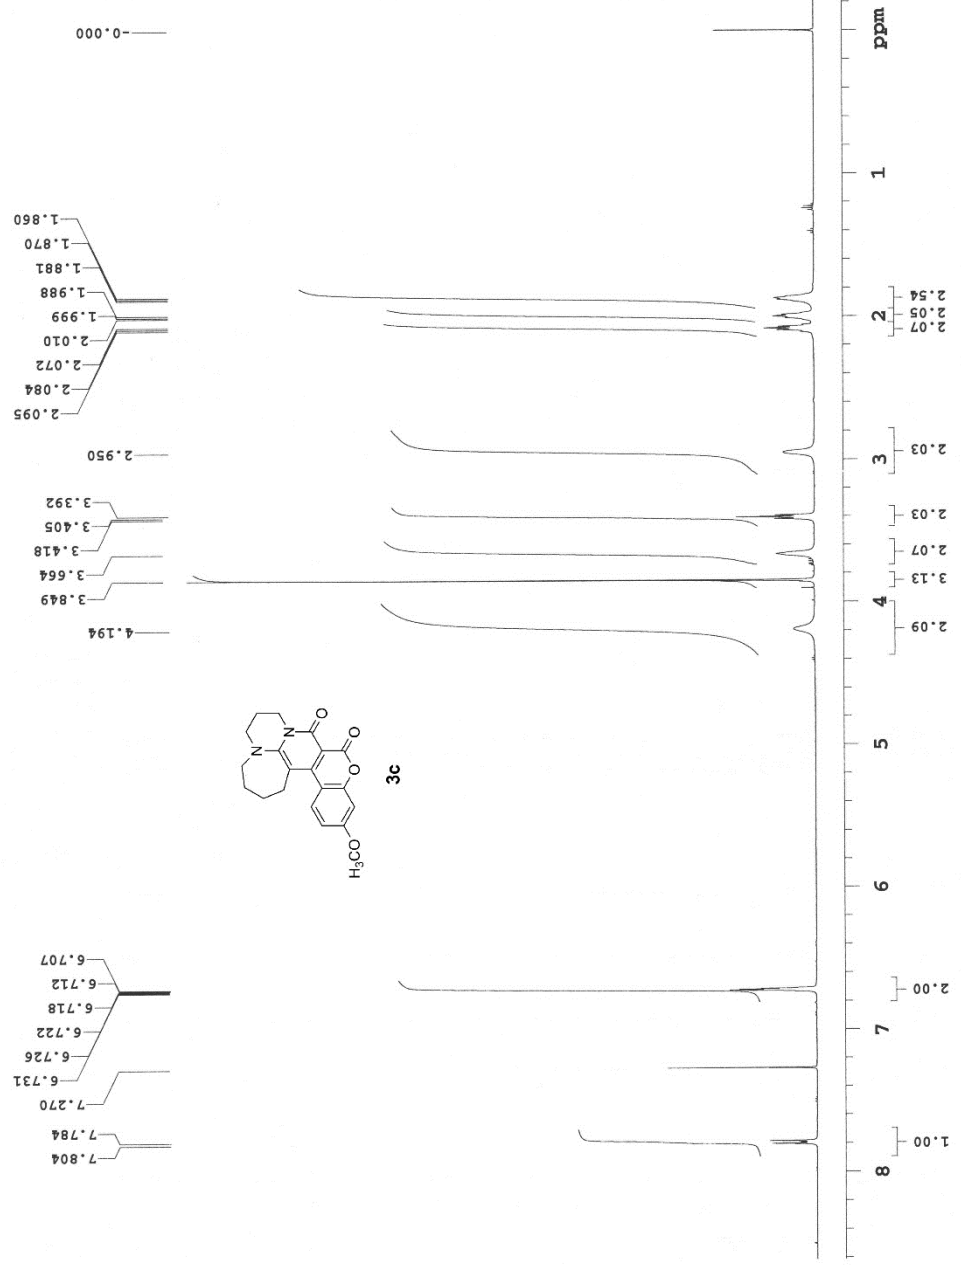

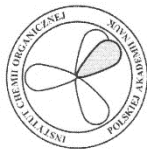

Yevgen Poronik  
zespl0/Var500/YP-2EP123/YP-2EP12  
3-C13

Sample Name:  
YP-2EP123  
Data Collected on:  
Varian-NMR-vmrs500  
Archive directory:

Sample directory:  
FidFile: CARBON  
Pulse Sequence: CARBON (s2pul)  
Solvent: CDCl3  
Data collected on: Nov 14 2013

Temp. 25.0 C / 298.1 K  
Operator: vnmr1

Relax. delay 1.000 sec  
Pulse 45.3 degrees  
Acq. time 1.730 sec  
Width 37878.8 Hz  
1728 repetitions  
OBSERVE C13, 125.6810428 MHz  
DECOUPLE H1, 499.8272777 MHz  
Power 38 dB  
continuously on  
WALTZ-16 modulated  
DATA PROCESSING  
29.974  
Line broadening 1.0 Hz  
FT size 131072

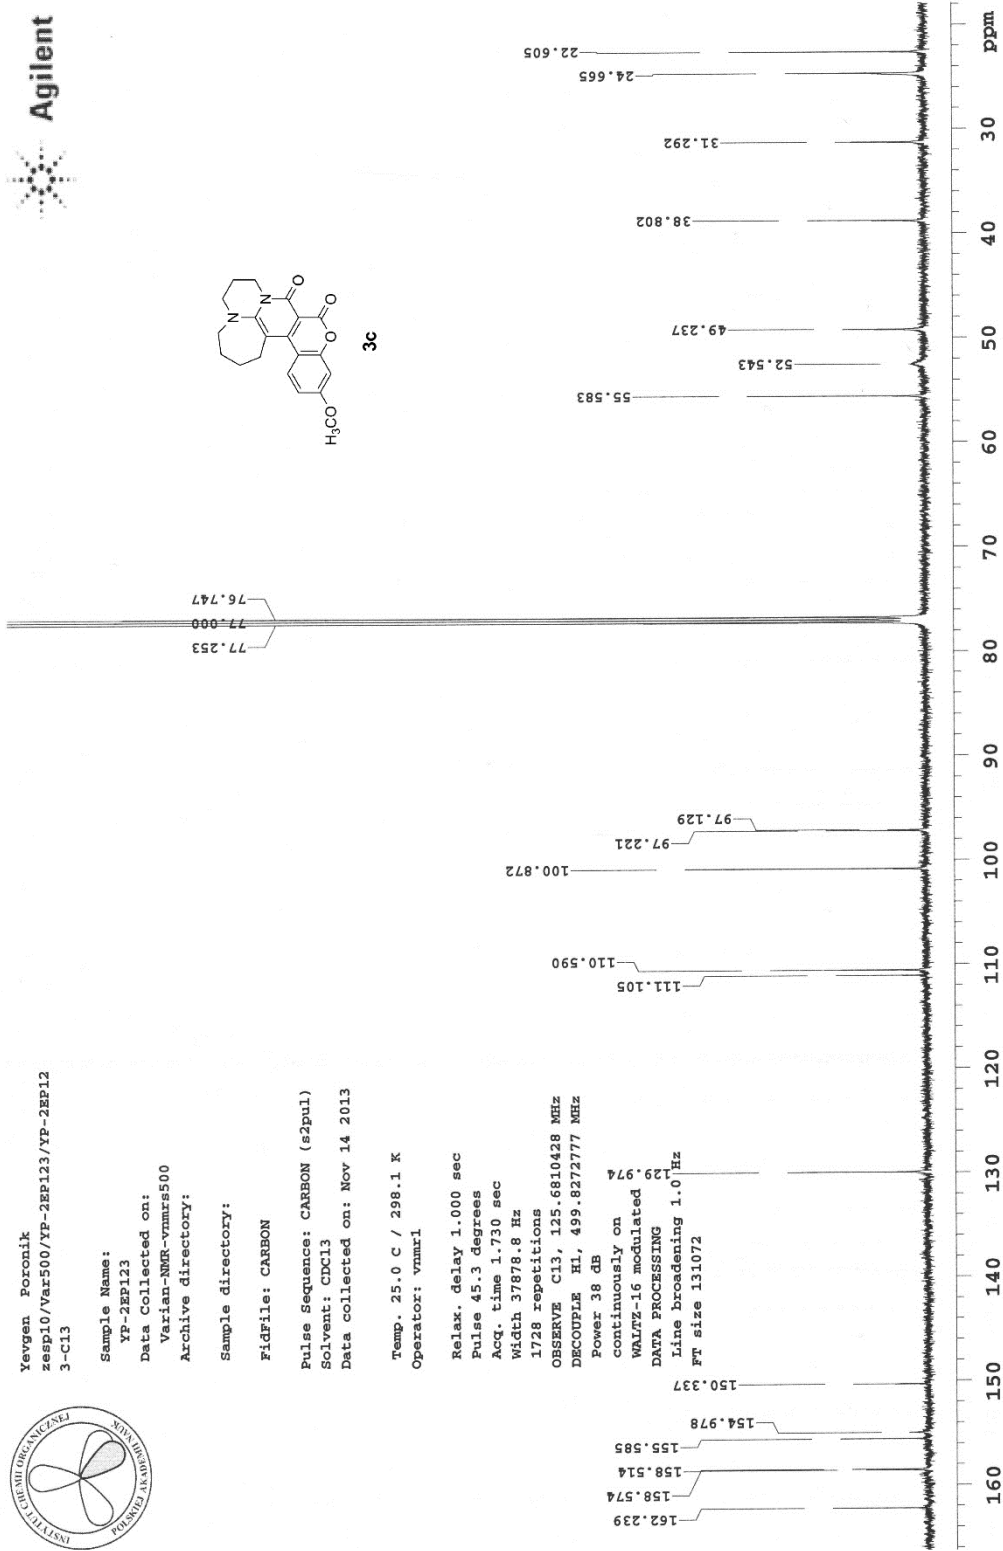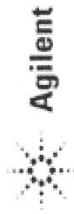

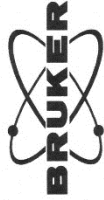

Current Data Parameters  
NAME NDBU  
EXNO 1  
PROCNO 1  
F2 - Acquisition Parameters  
Date\_ 20131025  
Time\_ 11.47  
INSTRUM DRX  
PROBHD 5 mm TBI 1H/13  
PULPROG zgpg30  
TD 65536  
SOLVENT CDCl3  
NS 64  
DS 0  
SWH 10330.578 Hz  
FIDRES 0.157632 Hz  
AQ 3.1711923 sec  
RG 4096  
DM 48.400 usec  
DE 6.78 usec  
TE 303.0 K  
D1 1.00000000 sec  
TD0 1  
===== CHANNEL f1 =====  
NUC1 13  
P1 8.20 usec  
PL1 5.00 dB  
SFO1 500.1330885 MHz  
F2 - Processing parameters  
SI 32768  
SF 500.1300235 MHz  
WDW no  
SSB 0  
GB 0  
PC 1.00

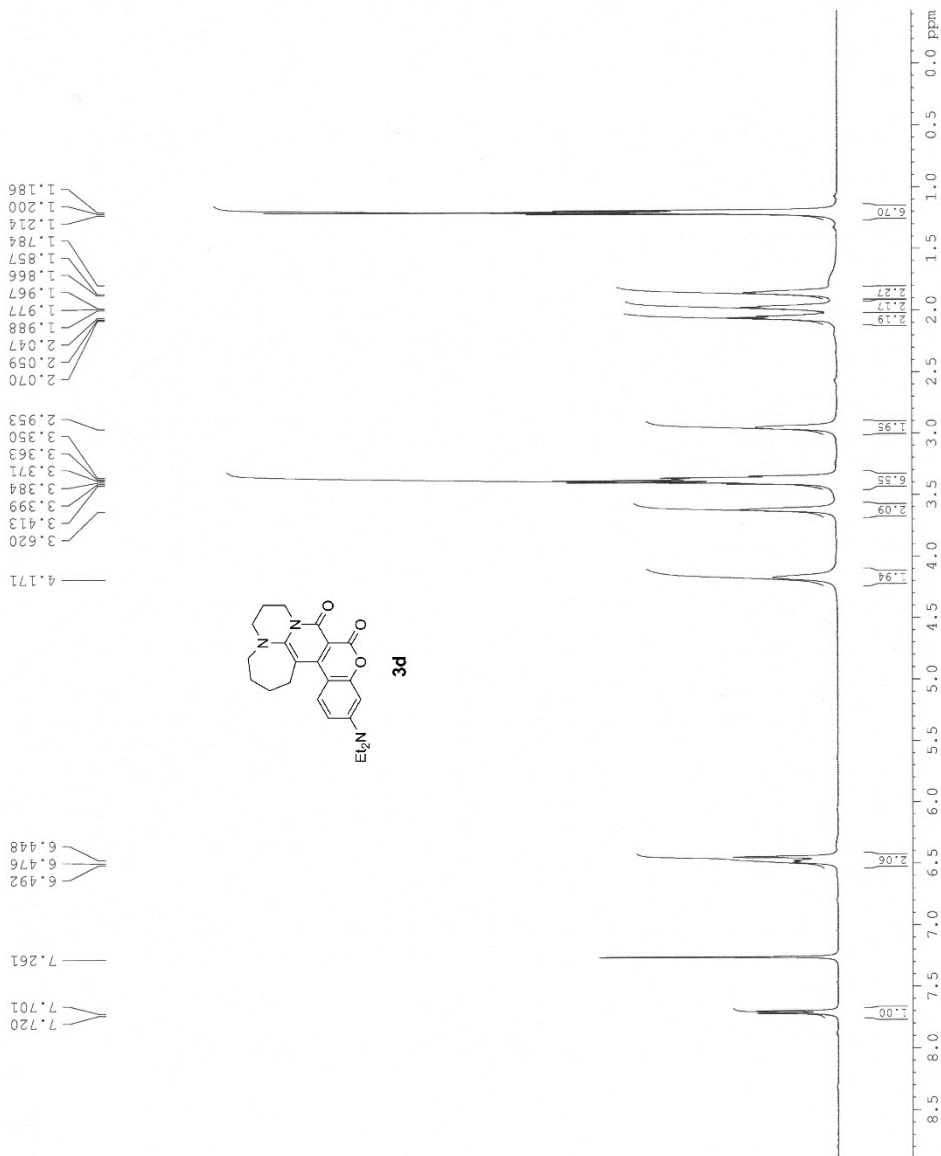

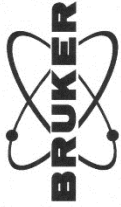

Current Data Parameters  
NAME 48F11  
EXPNO 2  
PROCNO 1

F2 - Acquisition Parameters

Date\_ 20111224  
Time 15.24  
INSTRUM DRX  
PROBHD 5 mm TBI 1H/13  
PULPROG zgpg  
CQ23  
SOLVENT CDCl3  
NS 30000  
DS 4  
SWH 32679.738 Hz  
FIDRES 0.495603 Hz  
AQ 1.000000 sec  
RG 32768  
DM 15.300 usec  
DE 7.10 usec  
TE 303.0 K  
TD 65536  
SFO1 500.132000 MHz  
D1 0.0300000 sec  
DELTA 0.89999998 sec  
TDO 1

===== CHANNEL f1 =====

NUC1 13C  
P1 5.00 usec  
PL1 -3.00 dB  
SFO1 125.7703643 MHz

===== CHANNEL f2 =====

CPDPRG2 waltz16  
NUC2 1H  
P2 98.00 usec  
PL2 3.00 dB  
PL12 2.00 dB  
PL13 32.00 dB  
SFO2 500.1320005 MHz

F1 - Acquisition parameters

TD 128  
SF01 500.132 MHz  
FIDRES 7.812500 Hz  
SFO1 500.1320005 MHz  
SW 1.999 Ppm  
FMODE OF

F2 - Processing parameters

SI 262144  
SF 125.7577955 MHz  
SFO1 125.7577955 MHz  
WDW EM  
SSB 0  
LB 0.50 Hz  
GB 0  
PC 1.40

F1 - Processing parameters

SI 4024  
SF 500.1320000 MHz  
SFO1 500.1320000 MHz  
WDW SINE  
SSB 0  
LB 0.30 Hz  
GB 0.1

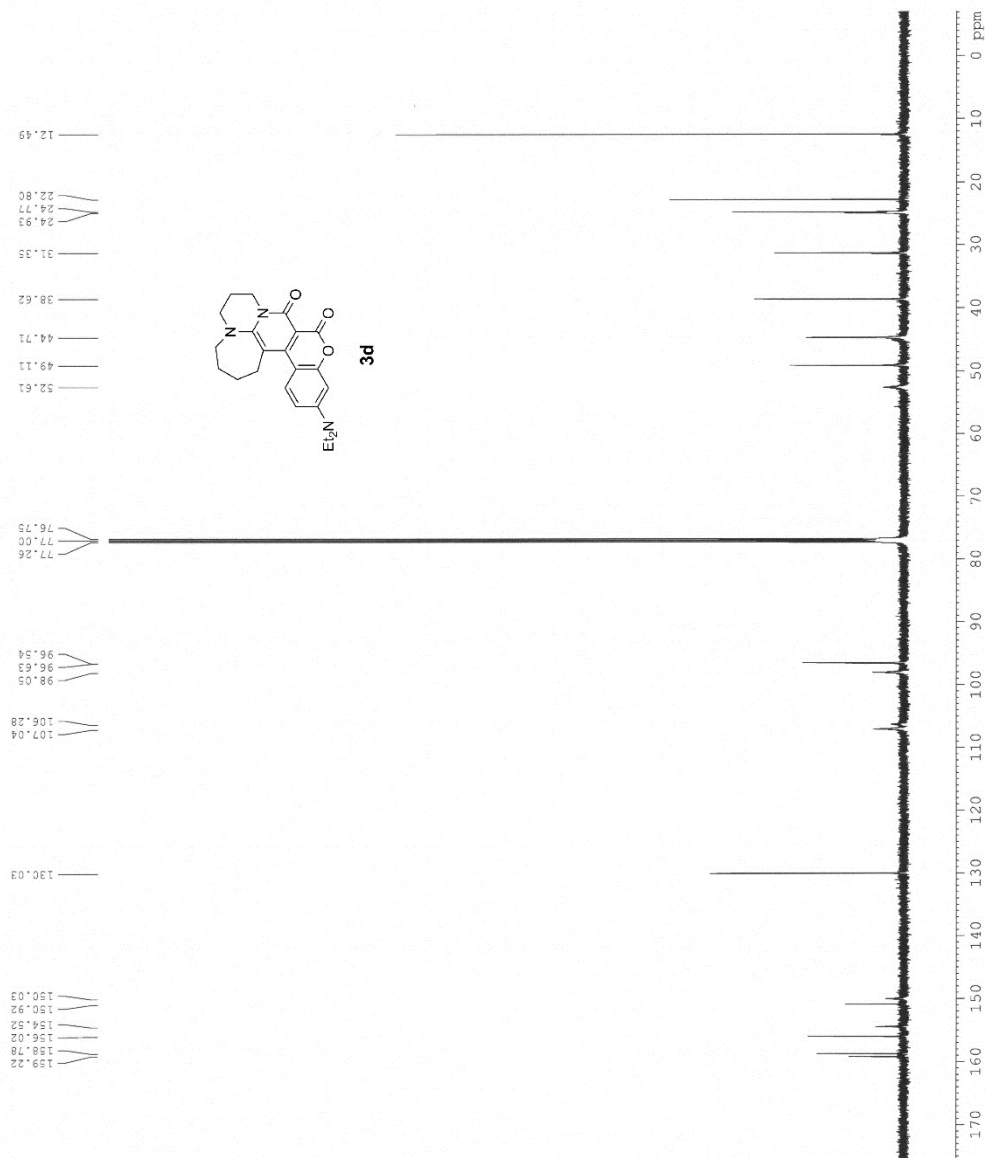

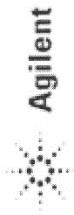

Y. Poronik

zesp10/Var500/ZEP133/ZEP133-H1

Sample Name:

ZEP133

Data Collected on:

Varian-NMR-vnmrs500

Archive directory:

Sample directory:

FidFile: PROTON

Pulse Sequence: PROTON (s2pul)

Solvent: cdcl3

Data collected on: Dec 10 2013

Temp. 25.0 C / 298.1 K

Operator: vnmri

Relax. delay 1.000 sec

Pulse 45.0 degrees

Acq. time 5.820 sec

Width 11261.3 Hz

32 repetitions

OBSERVE HL, 499.8247748 MHz

DATA PROCESSING

Ft size 131072

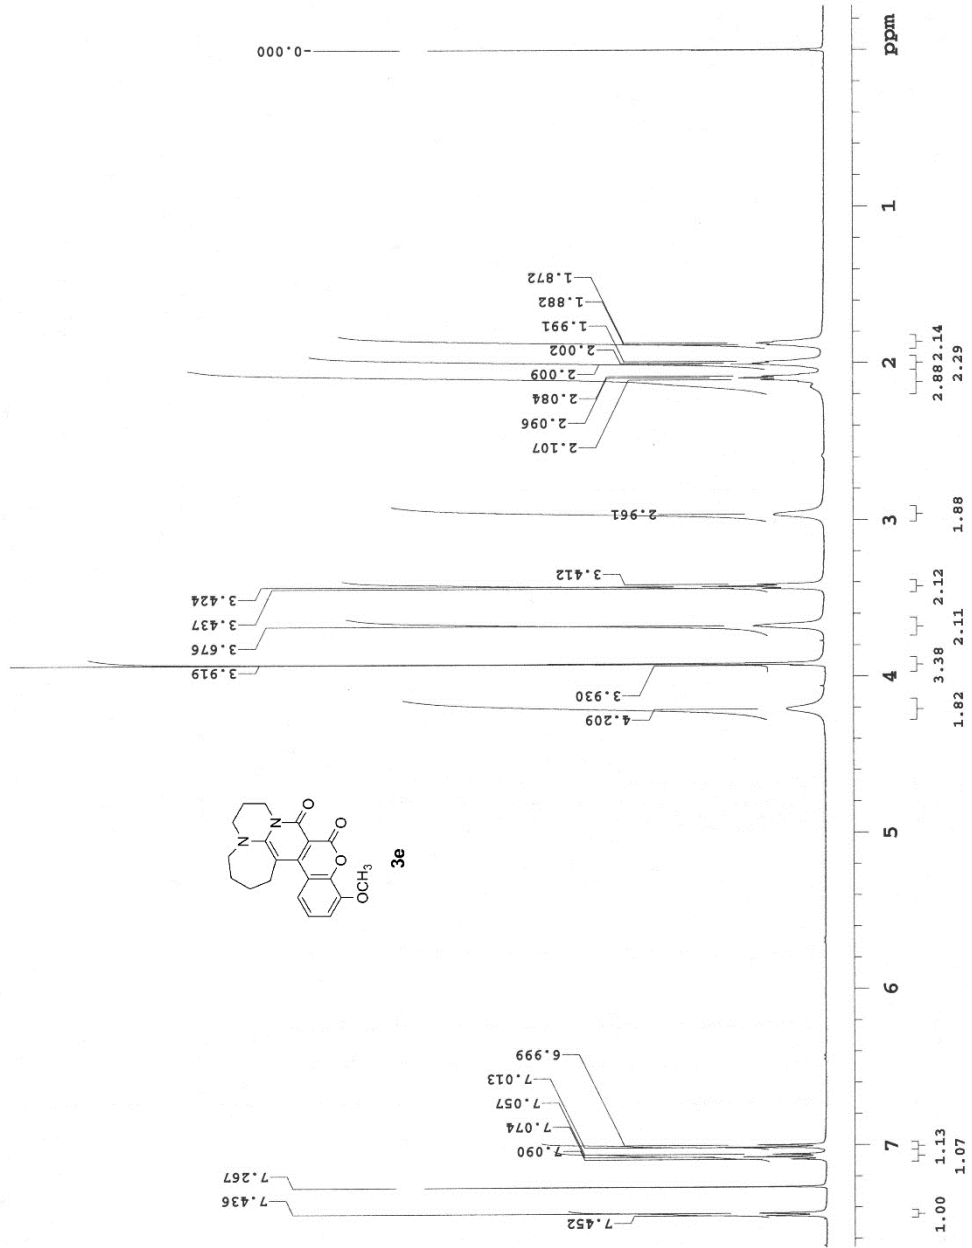



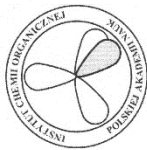

Yevgen Poronik  
zesp10/Var500/YP-2EF133/YP-2EF13  
3-C13

Sample Name:  
YP-2EF133  
Data Collected on:  
Varian-NMR-vnmr5500  
Archive directory:

Sample directory:  
FidFile: CARBON

Pulse Sequence: CARBON (s2pul)  
Solvent: CDCl3  
Data collected on: Nov 20 2013

Temp. 25.0 C / 298.1 K  
Operator: vnmr1

Relax. delay 1.000 sec  
Pulse 45.3 degrees  
Acq. time 1.730 sec  
Width 37878.8 Hz  
1760 repetitions  
OBSERVE C13, 125.6810428 MHz  
DECOUPLE H1, 499.8272777 MHz  
Power 38 dB  
continuously on  
WALTZ-16 modulated  
DATA PROCESSING  
Line broadening 0.0 Hz  
Ft size 131072

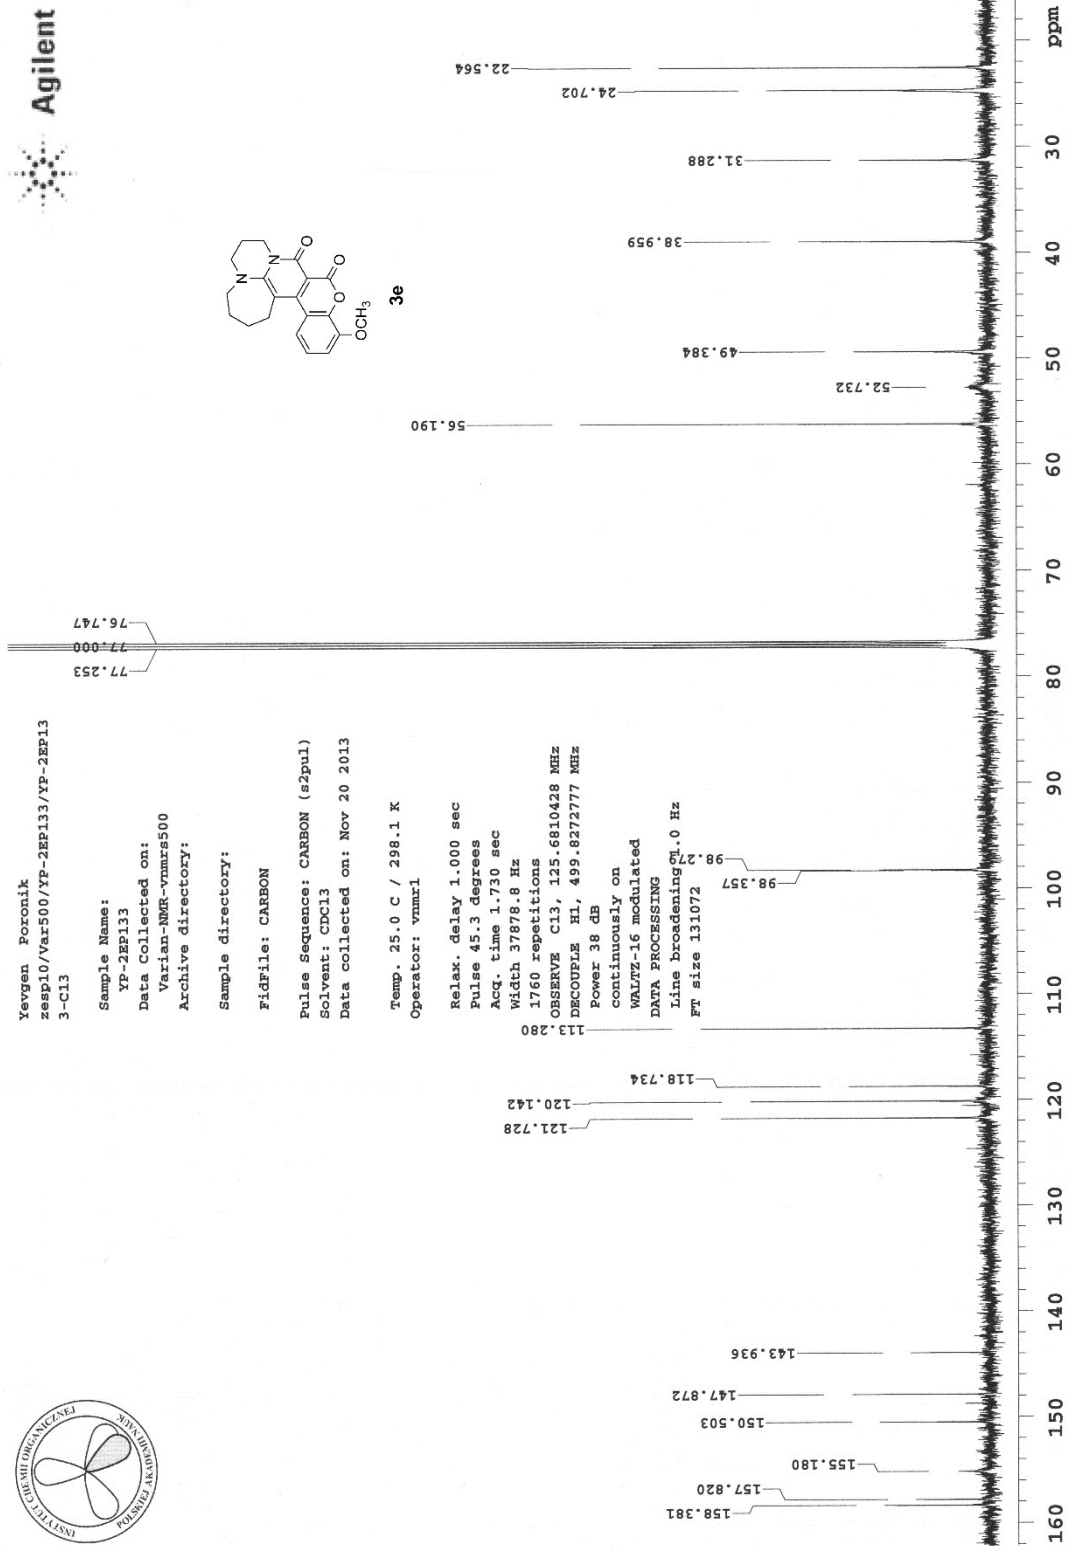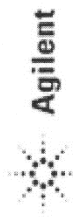

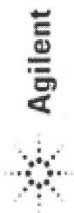

Y. Foronik  
zesp10/Var500/ZEP115/ZEP115-H1

Sample Name:  
ZEP115  
Data Collected on:  
Varian-NMR-vmrs500  
Archive directory:

Sample directory:  
Fidfile: PROTON  
Pulse Sequence: PROTON (s2pul)  
Solvent: tfa  
Data collected on: Oct 28 2013

Temp. 25.0 C / 298.1 K  
Operator: vmxr1  
Relax. delay 1.000 sec  
Pulse 45.0 degrees  
Acq. time 4.000 sec  
Width 10504.2 Hz  
32 repetitions  
OBSERVE H1, 499.8227052 MHz  
DATA PROCESSING  
Ft size 131072

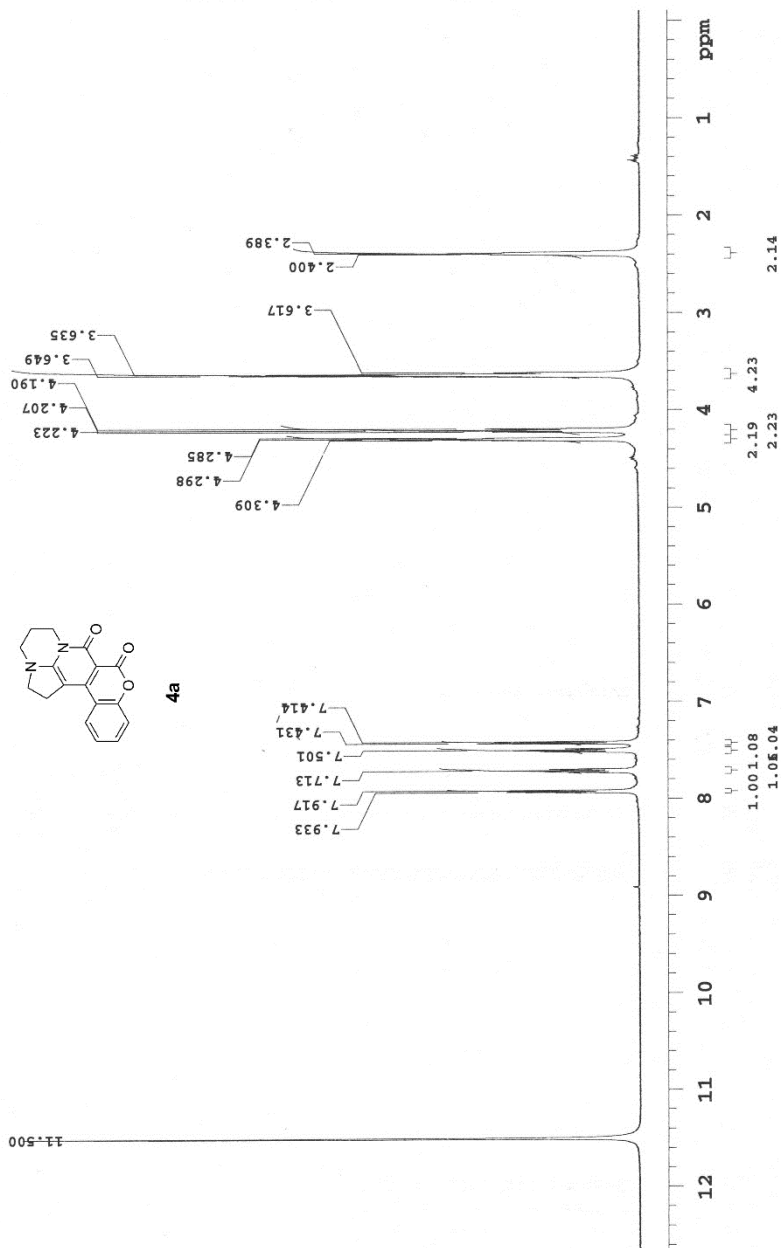

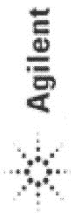

Y. Poronik  
zesp10/Var500/ZEP115/ZEP115-H1  
zesp10/Var500/ZEP115/ZEP115-C13

Sample Name:  
ZEP115  
Data Collected on:  
Varian-NMR-vmrs500  
Archive directory:

Sample directory:

FidFile: CARBON

Pulse Sequence: CARBON (s2pul)  
Solvent: tfa  
Data collected on: Oct 28 2013

Temp. 25.0 C / 298.1 K  
Operator: vmr1  
Relax. delay 0.500 sec  
Pulse 30.0 degrees  
Acq. time 1.200 sec  
Width 37878.8 Hz  
2432 repetitions  
OBSERVE C13, 125.6805052 MHz  
DECOUPLE H1, 499.8251485 MHz  
Power 38 dB  
continuously on  
WALTZ-16 modulated  
DATA PROCESSING  
Line broadening 1.0 Hz  
FT size 131072

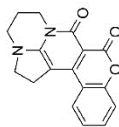

4a

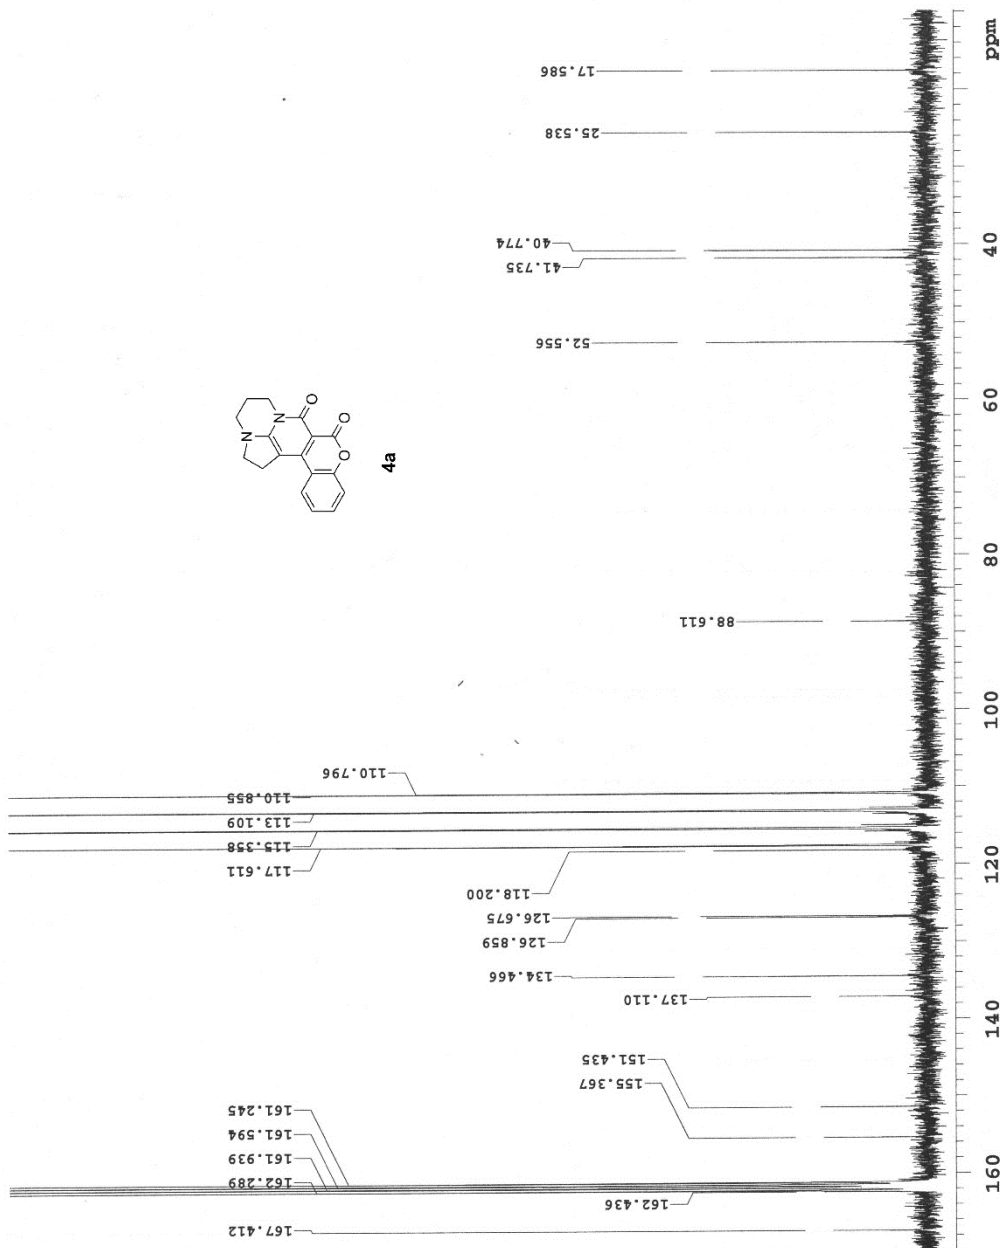

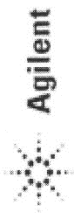

zesp10/Var500/YP-2EP128/YP-2EP12  
8-H1  
Yevgen Poronik

Sample Name:  
YP-2EP128  
Data Collected on:  
Varian-NMR-vmmr500  
Archive directory:

Sample directory:  
FIDFile: PROTON

Pulse Sequence: PROTON (s2pul)  
Solvent: TFA  
Data collected on: Nov 15 2013

Temp. 25.0 C / 298.1 K  
Operator: vmmr1

Relax. delay 1.000 sec  
Pulse 45.0 degrees  
Acq. time 5.924 sec  
Width 11061.9 Hz  
64 repetitions  
OBSERVE H1, 499.8227043 MHz  
DATA PROCESSING  
FT size 131072

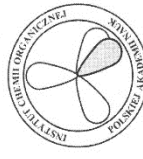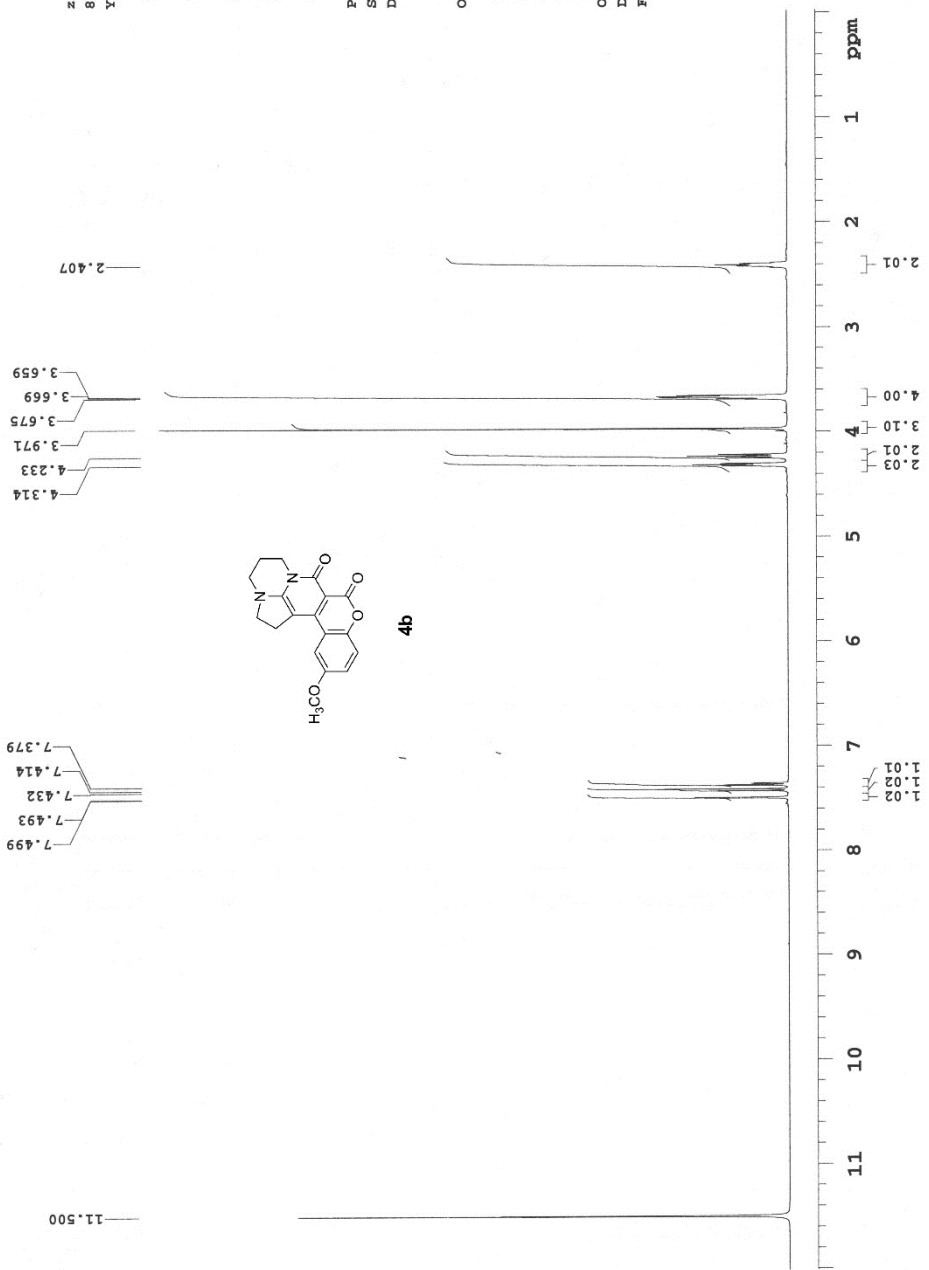

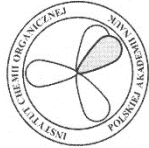

Agilent

Yevgen Poronik  
resp10/Var500/YP-2EF128/YP-2EF12  
8-C13

Sample Name:

YP-2EF128

Data Collected on:

Varian-NMR-vnmrs500

Archive directory:

Sample directory:

FidFile: CARBON

Pulse Sequence: CARBON (s2pul)

Solvent: TFA

Data collected on: Nov 15 2013

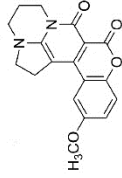

4b

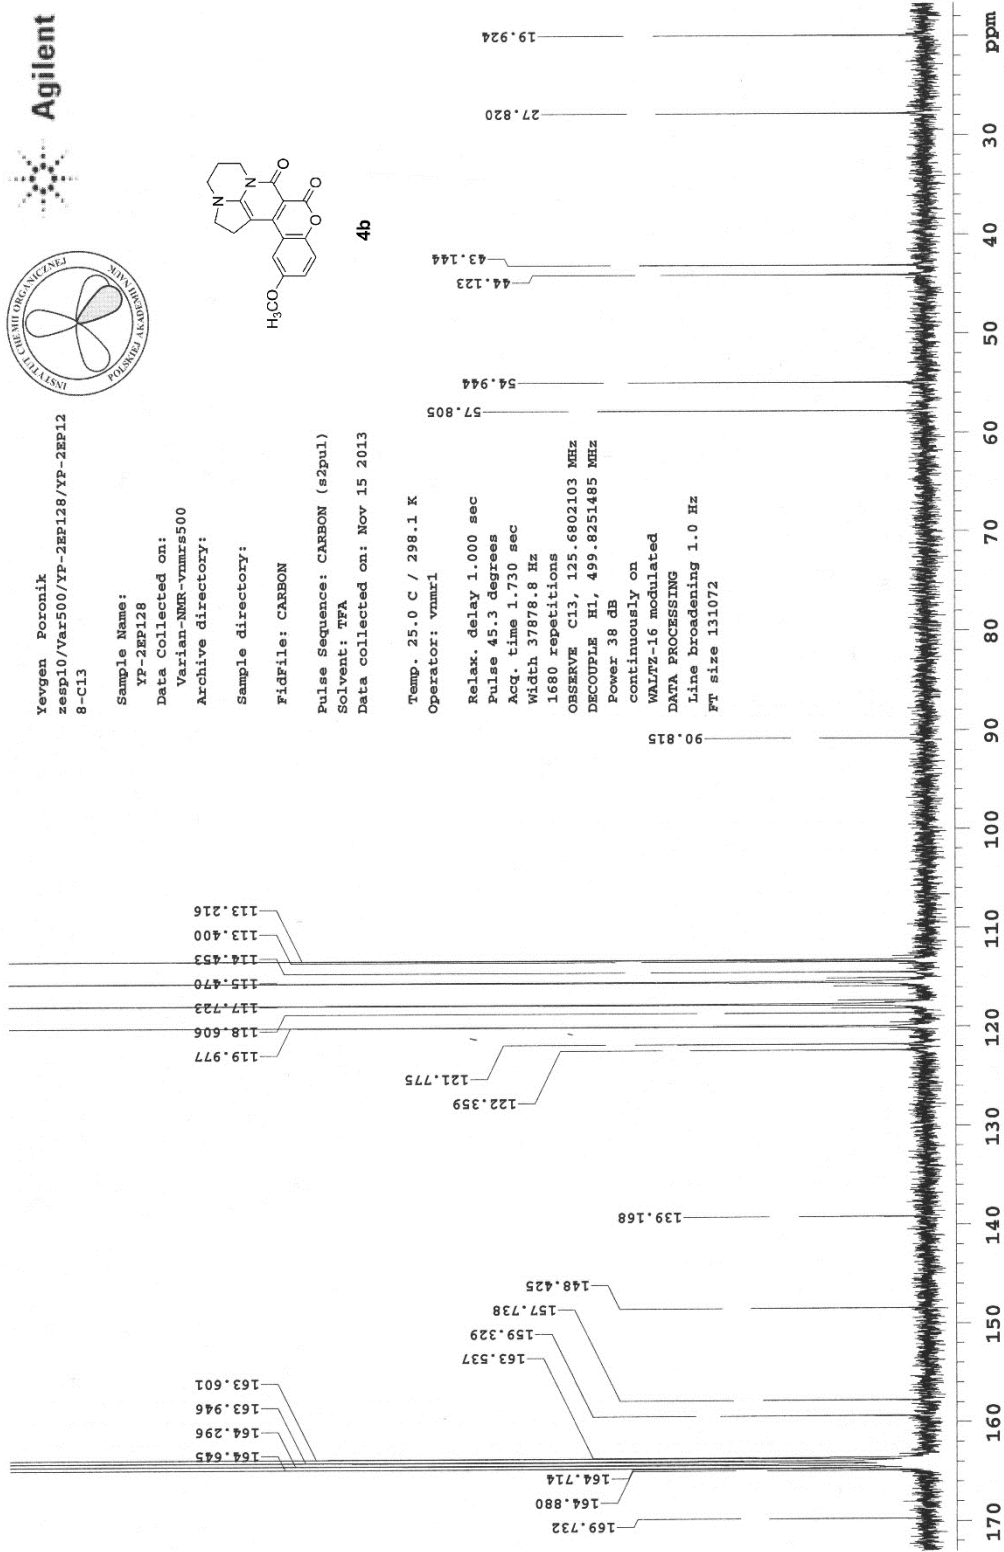

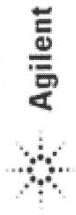

Yevgen Poronik  
zesp10/Var500/YP-2EP122/YP-2EP12  
2-H1

Sample Name:  
YP-2EP122  
Data Collected on:  
Varian-NMR-vmrns500  
Archive directory:

Sample directory:  
Fidfile: PROTON

Pulse Sequence: PROTON (s2pul)  
Solvent: TFA  
Data collected on: Nov 15 2013

Temp. 25.0 C / 298.1 K  
Operator: vmrnl

Relax. delay 1.000 sec  
Pulse 45.0 degrees  
Acq. time 5.924 sec  
Width 11061.9 Hz  
80 repetitions  
OBSERVE H1, 499.8227033 MHz  
DATA PROCESSING  
Ft size 131072

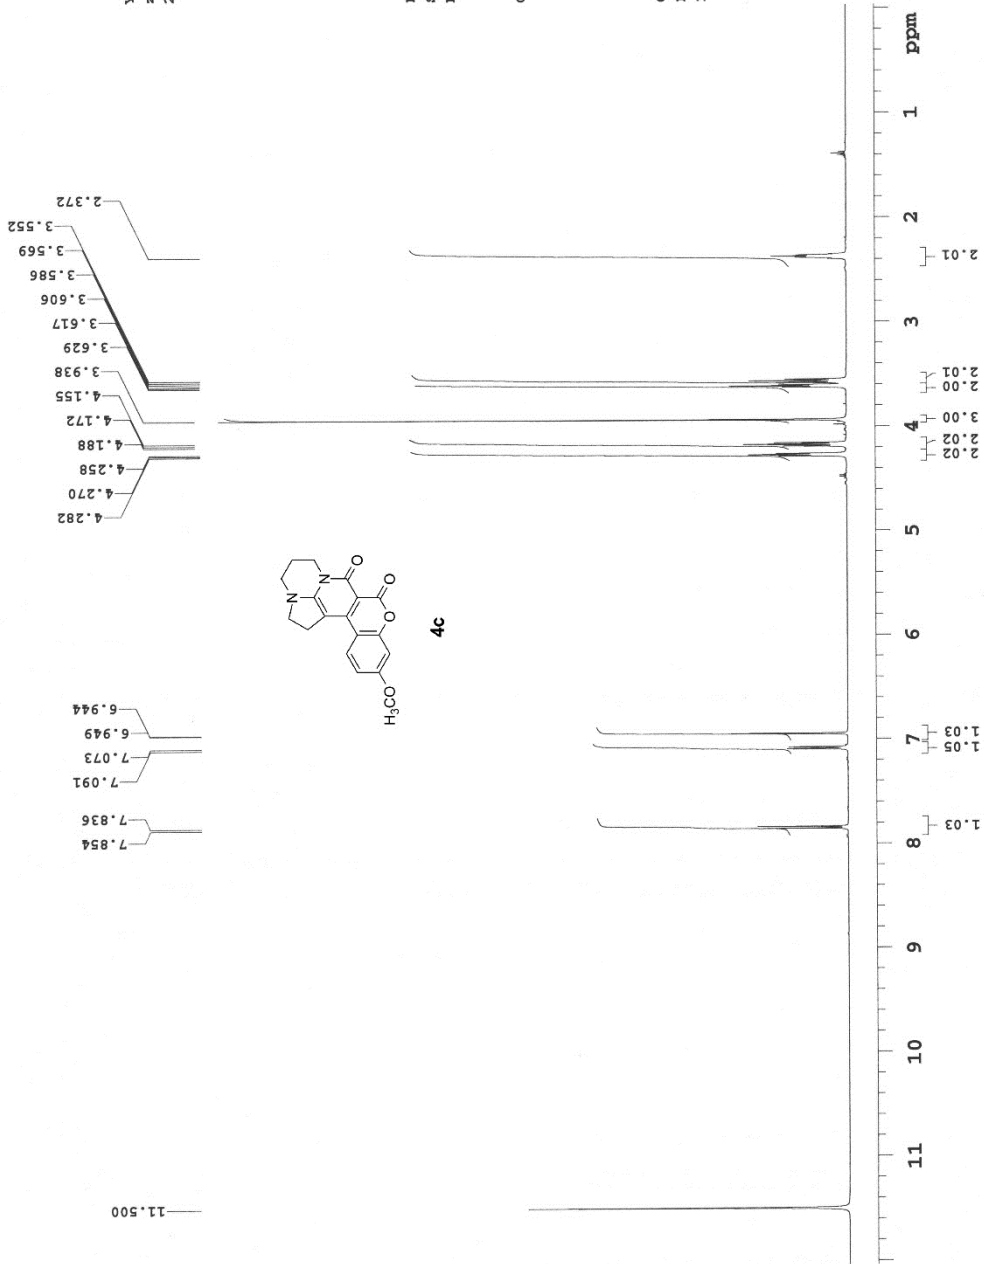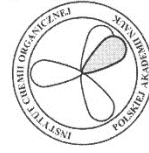

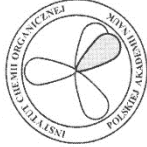

Agilent

Yevgen Poronik  
zesp10/Var500/YP-2EP122/YP-2EP12  
2-C13

Sample Name:  
YP-2EP122  
Data Collected on:  
Varian-NMR-vnmrs500  
Archive directory:  
Sample directory:  
Fidfile: CARBON

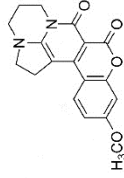

Pulse Sequence: CARBON (s2pul)  
Solvent: TFA  
Data collected on: Nov 15 2013

4c

Temp. 25.0 C / 298.1 K  
Operator: vnmr1

Relax. delay 1.000 sec  
Pulse 45.3 degrees  
Acq. time 1.730 sec  
Width 37878.8 Hz  
1408 repetitions  
OBSERVE C13, 125.6802103 MHz  
DECOUPLE H1, 499.8251485 MHz  
Power 38 dB  
continuously on  
WALTZ-16 modulated  
DATA PROCESSING  
Line broadening 1.0 Hz  
Ft size 131072

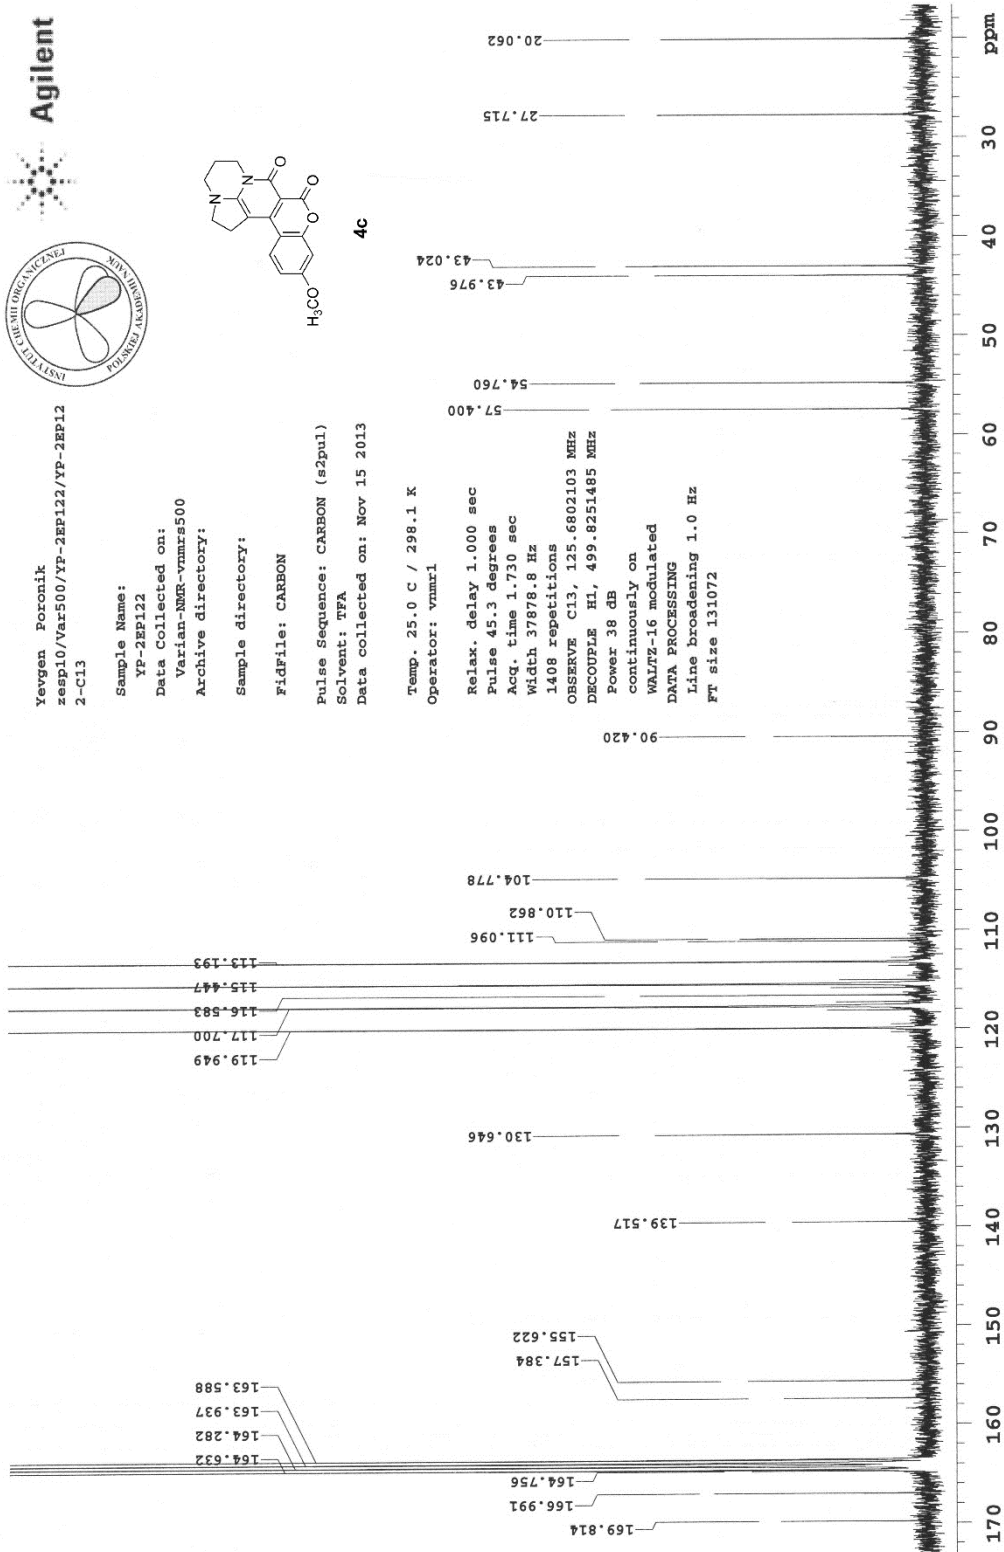

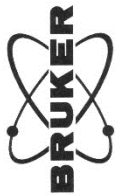

Current Data Parameters  
NAME ZEP118-DmsO  
EXPNO 11  
PROCNO 1

F2 - Acquisition Parameters  
Date\_ 20141210  
Time 12:33  
INSTRUM DRX  
PROBHD 5 mm TBI 1H/13  
PULPROG zg30  
TD 65536  
SOLVENT DMSO  
NS 16  
DS 0  
SWH 10330.570 Hz  
FIDRES 0.157632 Hz  
AQ 3.1719923 sec  
RG 181  
DW 48.400 usec  
DE 6.78 usec  
TE 323.1 K  
D1 1.00000000 sec  
TD0 1

==== CHANNEL f1 =====  
NUC1 1H  
P1 8.20 usec  
PL1 5.00 dB  
SFO1 500.1330885 MHz

F2 - Processing parameters  
SI 32768  
SF 500.1300094 MHz  
WDW no  
SSB 0  
LB 0.00 Hz  
GB 0  
PC 1.00

Temp. 323K

3.780  
3.764  
3.748  
3.723  
3.403  
3.389  
3.291  
3.236  
3.220  
3.204  
3.173  
2.491  
2.029  
1.141  
1.128  
1.115

7.625  
7.607  
6.568  
6.551  
6.308

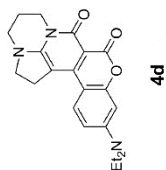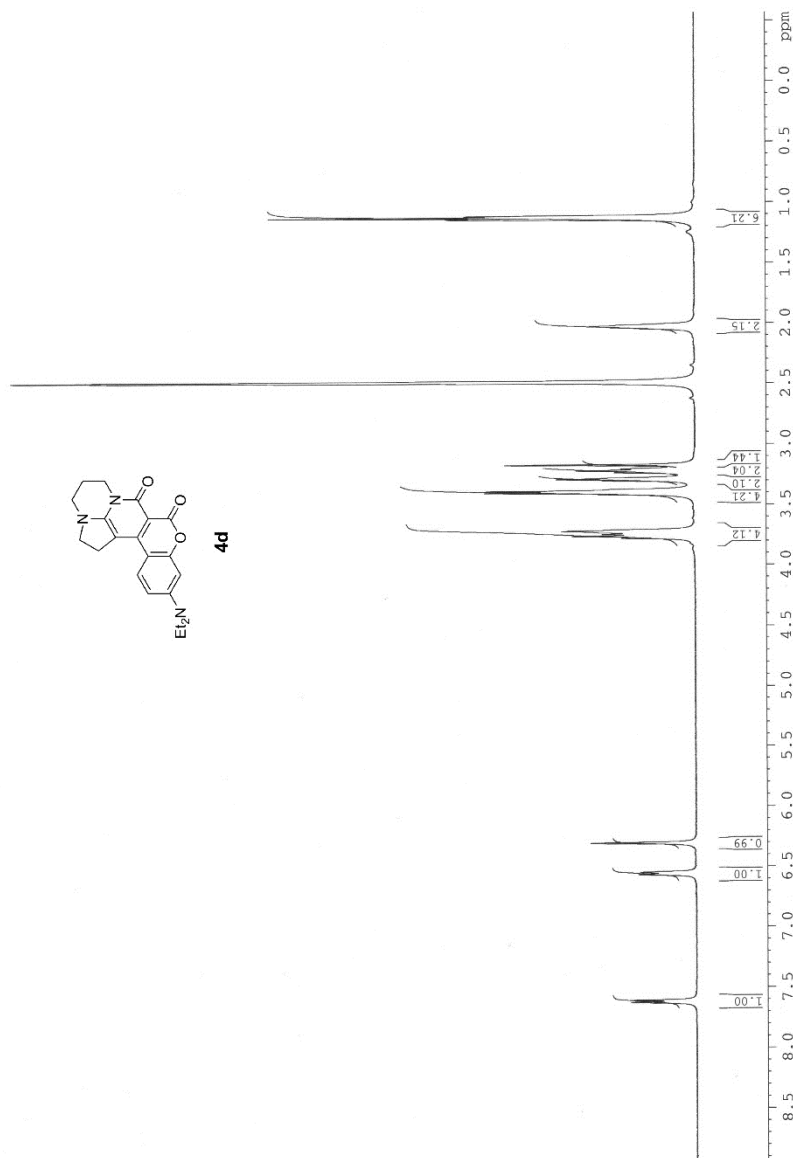



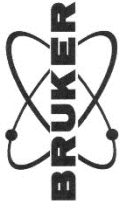

Current Data Parameters  
NAME ZEP118-dmsd  
EXPNO 2  
PROCNO 1

F2 - Acquisition Parameters  
Date\_ 20140210  
Time 12.39  
INSTRUM DFX  
PROBHD 5 mm TEI HX13  
PULPROG zgpg30  
TD 65536  
SOLVENT DMSO  
NS 3100  
DSB 0  
SFO1 32679.738 Hz  
SFO2 0.498653 Hz  
FIDRES 1.0027508 sec  
RG 32768  
DW 15.300 usec  
DE 1.1 usec  
TE 323.0 K  
D1 1.00000000 sec  
d11 0.03000000 sec  
DELTA 0.89999998 sec  
TD0 1

==== CHANNEL f1 =====  
NUC1 13C  
P1 5.00 usec  
PL 0.00 dB  
SFO1 125.7703693 MHz

==== CHANNEL f2 =====  
CPDPRG2 waltz16  
NUC2 1H  
P2 98.00 usec  
PL2 3.00 dB  
PL12 23.00 dB  
PL13 32.00 dB  
SFO2 500.1320005 MHz

F1 - Acquisition Parameters  
ND0 1  
TD 128  
SFO1 500.132 MHz  
SFO2 125.7703693 MHz  
FIDRES 7.8120000 Hz  
RG 1.999 Ppm  
PAMODE QF

F2 - Processing parameters  
SI 2048  
SF 125.7576793 MHz  
WDW EM  
SSB 0  
LB 0.50 Hz  
GB 0  
FC 1.40

F1 - Processing parameters  
SI 1024  
MC2 OF  
SFO1 500.1300000 MHz  
WDW SINE  
SSB 0  
LB 0.30 Hz  
GB 0.1

Temp. 323K

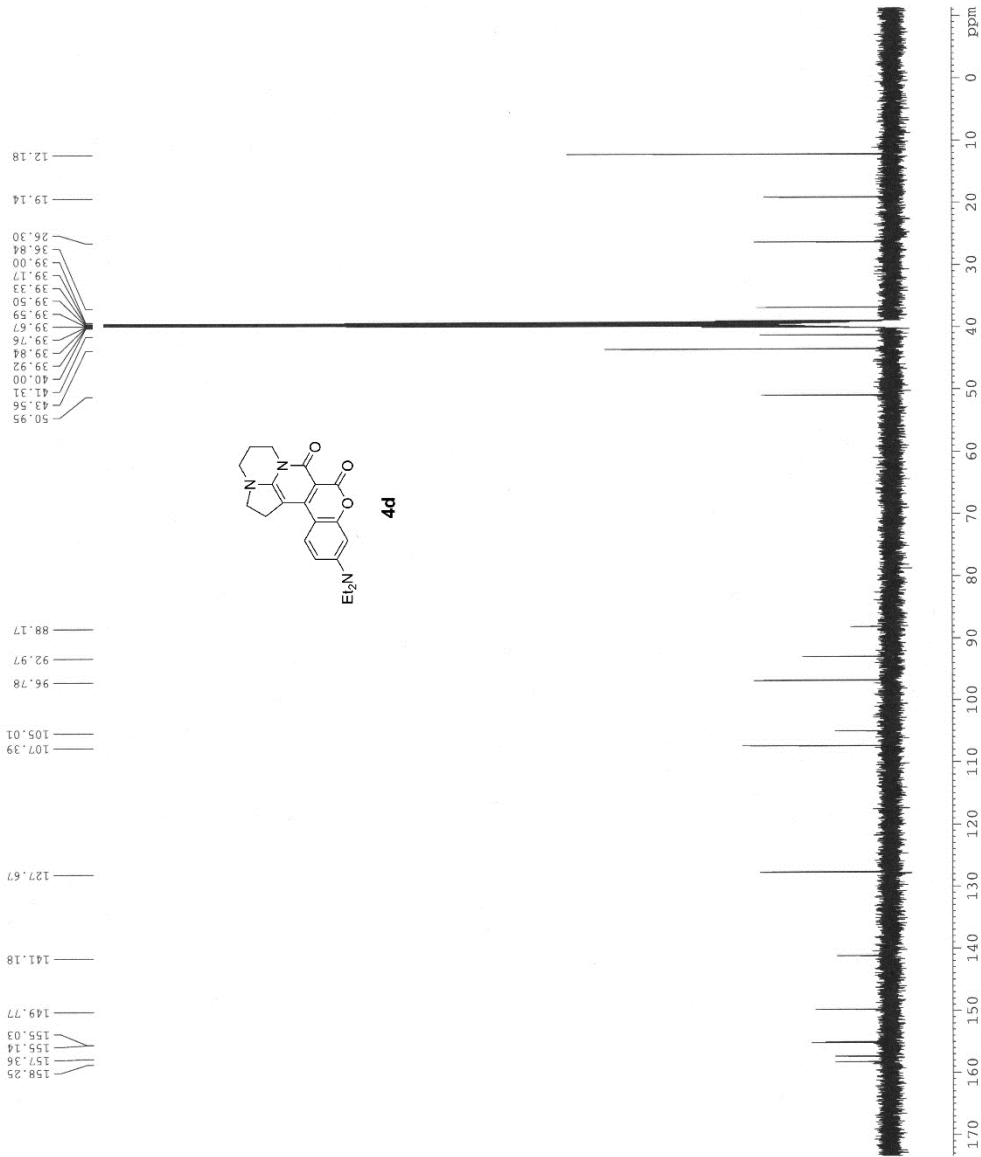

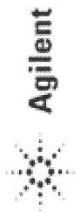

Yevgen Poronik  
zesp10/Var500/YP-2EP134/YP-2EP13  
4-H1

Sample Name:  
YP-2EP134  
Data Collected on:  
Varian-NMR-vnmrs500  
Archive directory:

Sample directory:  
FIDFile: PROTON

Pulse Sequence: PROTON (s2pul)  
Solvent: TFA  
Data collected on: Nov 20 2013

Temp. 25.0 C / 298.1 K  
Operator: vmr1

Relax. delay 1.000 sec  
Pulse 45.0 degrees  
Acq. time 5.924 sec  
Width 11061.9 Hz  
88 repetitions  
OBSERVE H1, 499.8227054 MHz  
DATA PROCESSING  
FT size 131072

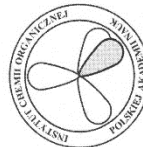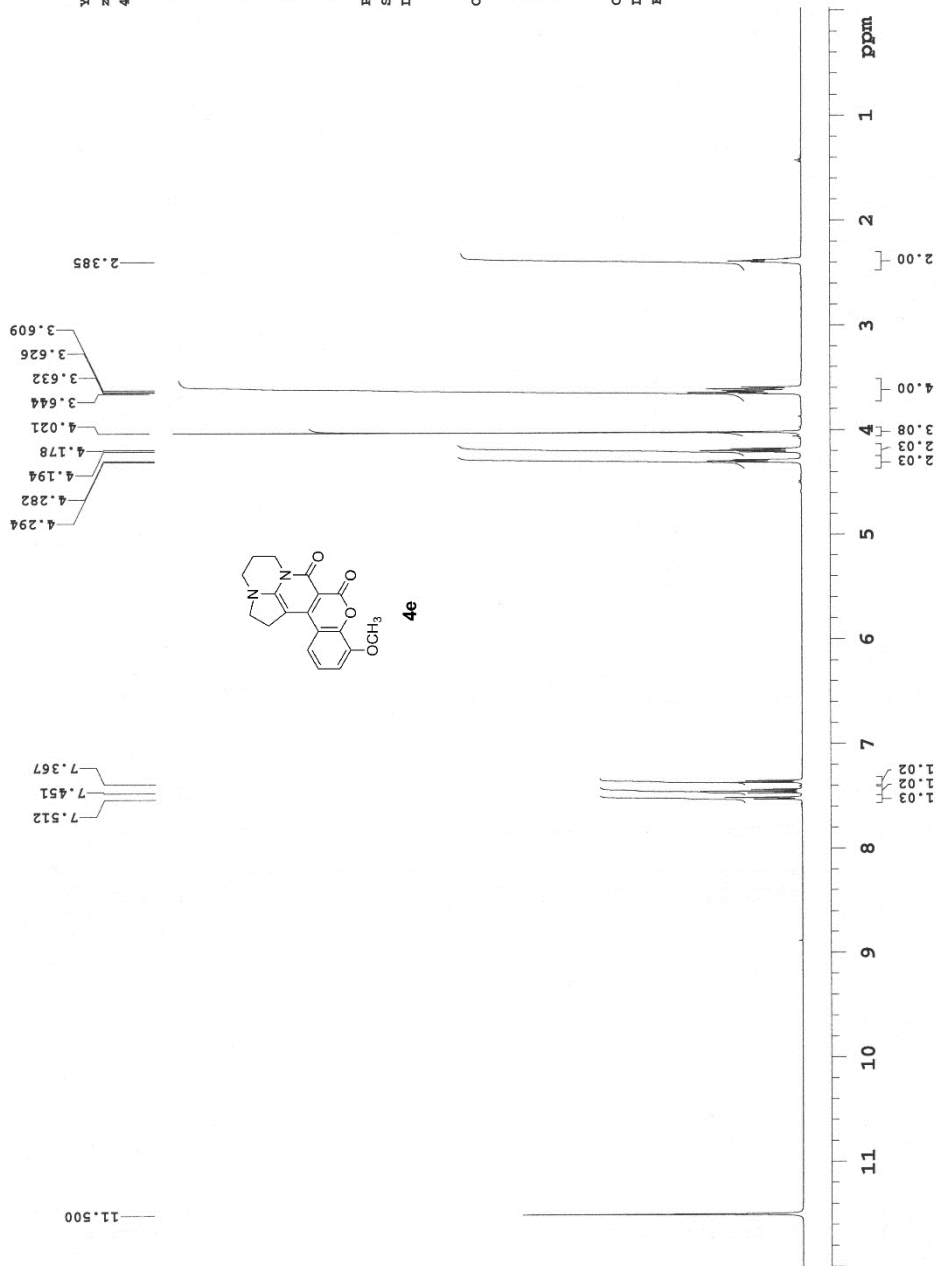

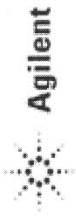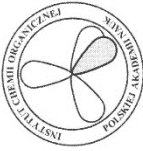

Yevgen Foronik  
 zesp10/Var500/YP-2EP134/YP-2EP13  
 4-C13

Sample Name:  
 YP-2EP134  
 Data Collected on:  
 Varian-NMR-vnmrs500  
 Archive directory:  
 Sample directory:

File: CARBON  
 Pulse Sequence: CARBON (s2pul)  
 Solvent: TFA  
 Data collected on: Nov 20 2013

Temp. 25.0 C / 298.1 K  
 Operator: vnmr1

Relax. delay 1.000 sec  
 Pulse 45.3 degrees  
 Acq. time 1.730 sec  
 Width 37878.8 Hz  
 1168 repetitions  
 OBSERVE C13, 125.6802074 MHz  
 DECOUPLE H1, 499.8251485 MHz  
 Power 38 dB  
 continuously on  
 WALTZ-16 modulated  
 DATA PROCESSING  
 Line broadening 0.5 Hz  
 FT size 131072

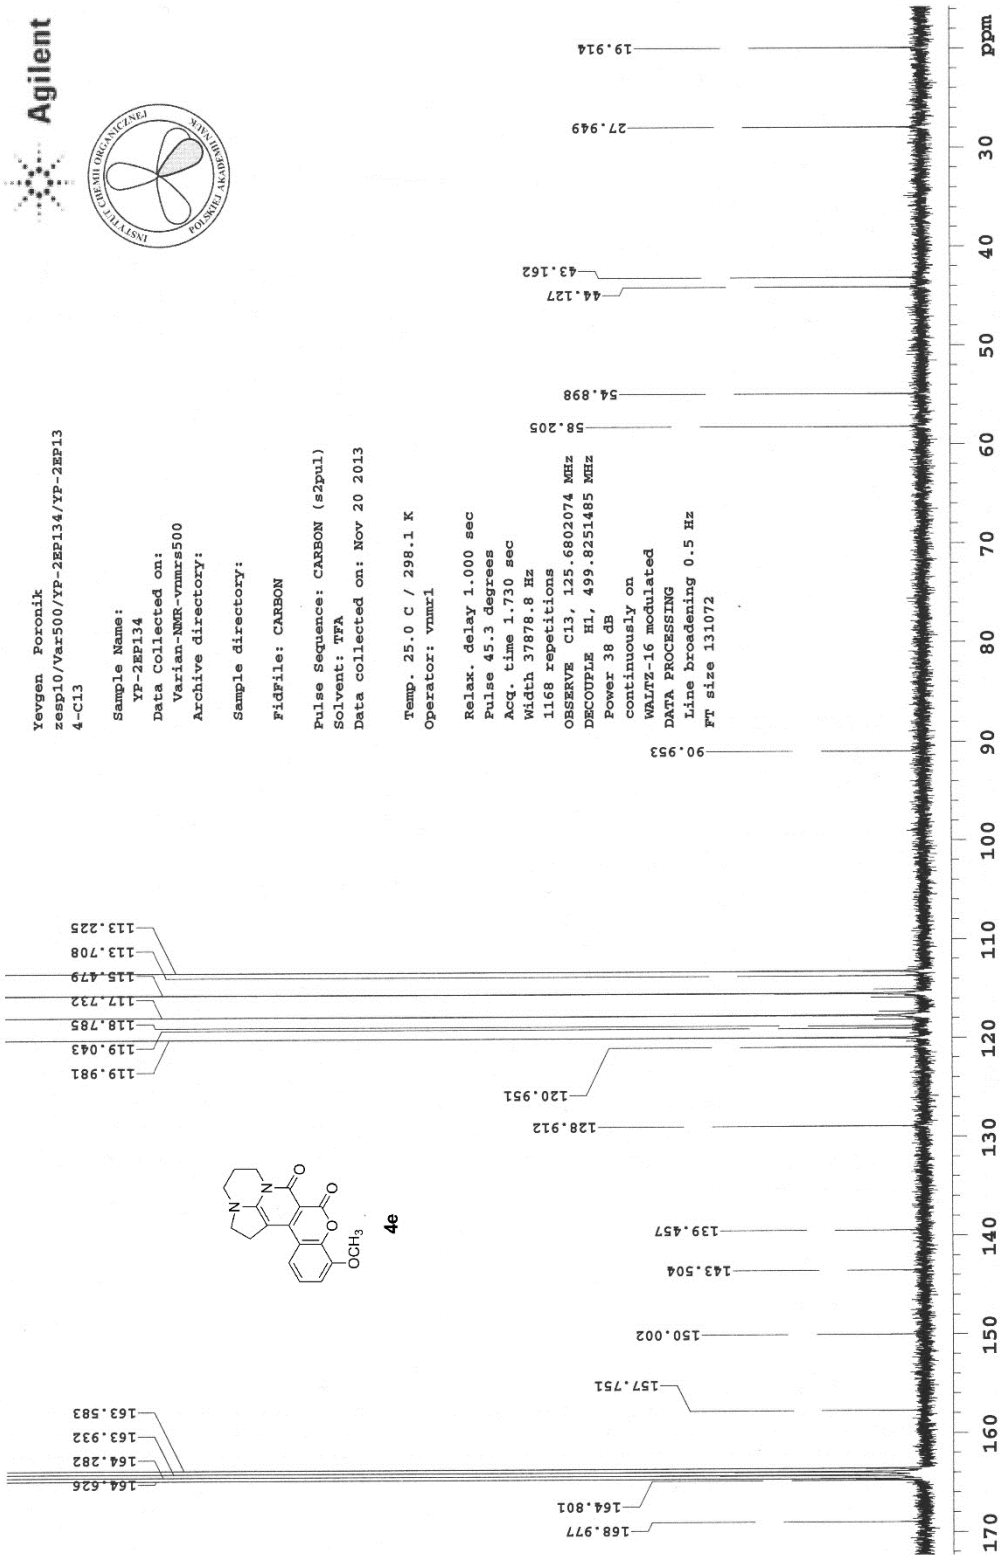

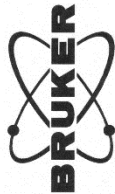

Current Data Parameters  
NAME ZEP137  
EXPNO 1  
PROCNO 1

F2 - Acquisition Parameters

Date\_ 20140130  
Time 13.41  
PULPROG zgpg30  
PCPDPRG 5 mm TBI W/30  
FIDPROC zg30  
TD 65536  
SOLVENT CDCl3  
NS 32  
DS 0  
SWH 10330.578 Hz  
FIDRES 0.157632 Hz  
AQ 3.171923 sec  
RG 320  
DW 48.400 usec  
DE 6.78 usec  
TE 303.0 K  
DL 1.0000000 sec  
ID0 1

===== CHANNEL f1 =====  
NUC1 <sup>1</sup>H  
P1 8.20 usec  
PL1 5.00 dB  
SFO1 500.1330885 MHz

F2 - Processing parameters  
SI 32768  
SF 500.1300234 MHz  
WDW no  
SSB 0  
GB 0  
PC 1.00

1.282  
1.264  
1.254  
1.231  
1.216  
1.202  
0.894  
0.881  
0.867

3.109  
3.121  
3.141  
3.153  
3.353  
3.369  
3.384  
3.401  
3.411  
3.711  
3.723  
3.728  
3.733  
3.740  
3.784  
4.150  
4.164  
4.172  
4.179  
4.186  
4.195  
4.200  
4.209  
4.215  
4.223  
4.231  
4.238  
4.245  
4.259

6.717  
6.722  
6.777  
6.782  
6.794  
6.800  
6.981  
6.999  
7.260

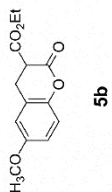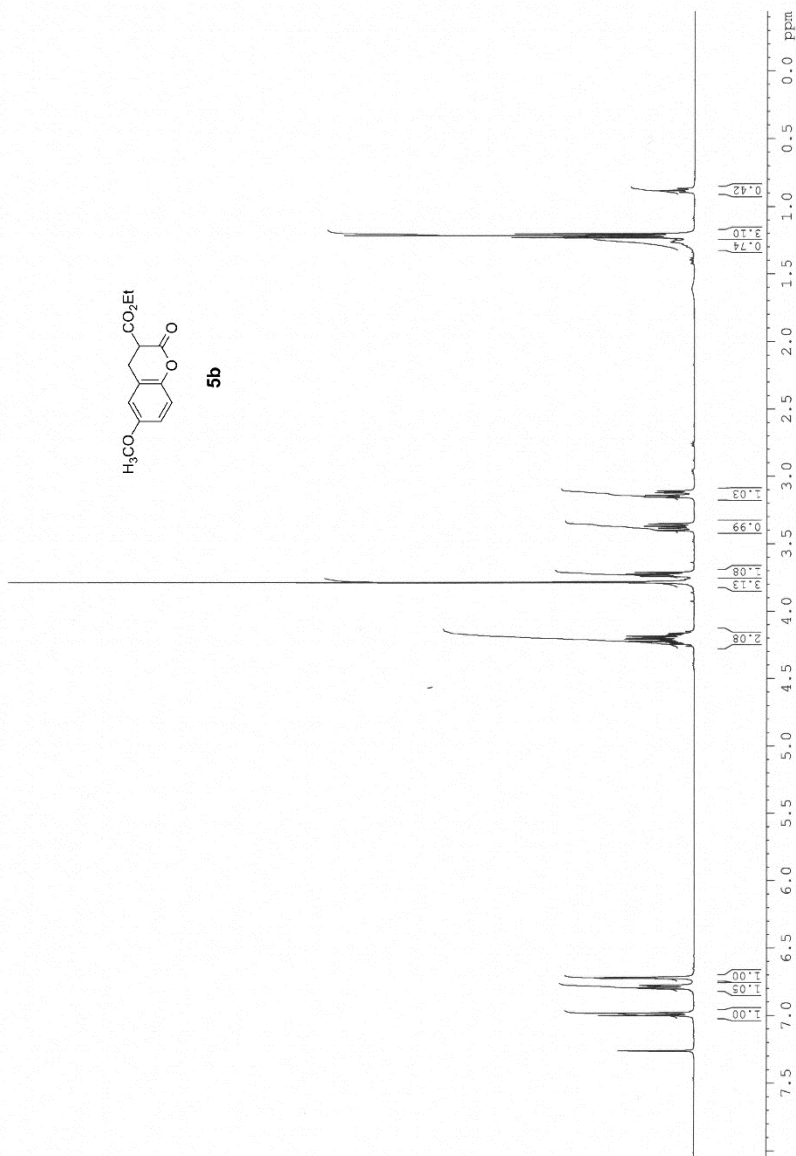

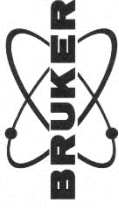

Current Data Parameters  
NAME ZEP137  
PROCNO 1

F2 - Acquisition Parameters  
Date\_ 20140110  
Time 14.13  
INSTRUM spect  
PROBHD 5 mm TBI 1H/13  
PULPROG zgpg30  
TD 65536  
SOLVENT CDCl3  
DS 4  
SWH 32679.738 Hz  
FIDRES 0.498653 Hz  
AQ 1.0027508 sec  
RG 655.36  
DE 15.300 usec  
TE 303.0 K  
D1 1.0000000 sec  
DELTA 0.0300000 sec  
TD0 0.039999998 sec  
TD0 1

===== CHANNEL f1 =====  
NUC1 13C  
P1 5.00 usec  
PL1 0.00 dB  
SFO1 125.7703643 MHz

===== CHANNEL f2 =====  
PROG2 waltz16  
NUC2 1H  
PCPD2 98.00 usec  
PL2 3.00 dB  
PL12 23.00 dB  
PL13 0.00 dB  
SFO2 500.1320005 MHz

F1 - Acquisition parameters  
ND0 1  
SI 129  
SFO1 500.1320005 MHz  
FIDRES 7.812500 Hz  
SW 1.999 ppm  
FMODE QF

F2 - Processing parameters  
SI 262144  
SF 125.7577939 MHz  
WDW EM  
SSB 0  
B 0  
GB 0.50 Hz  
PC 1.40

F1 - Processing parameters  
MC 1024  
SF 500.1300000 MHz  
WDW SINE  
SSB 0  
LB 0.30 Hz  
GB 0.1

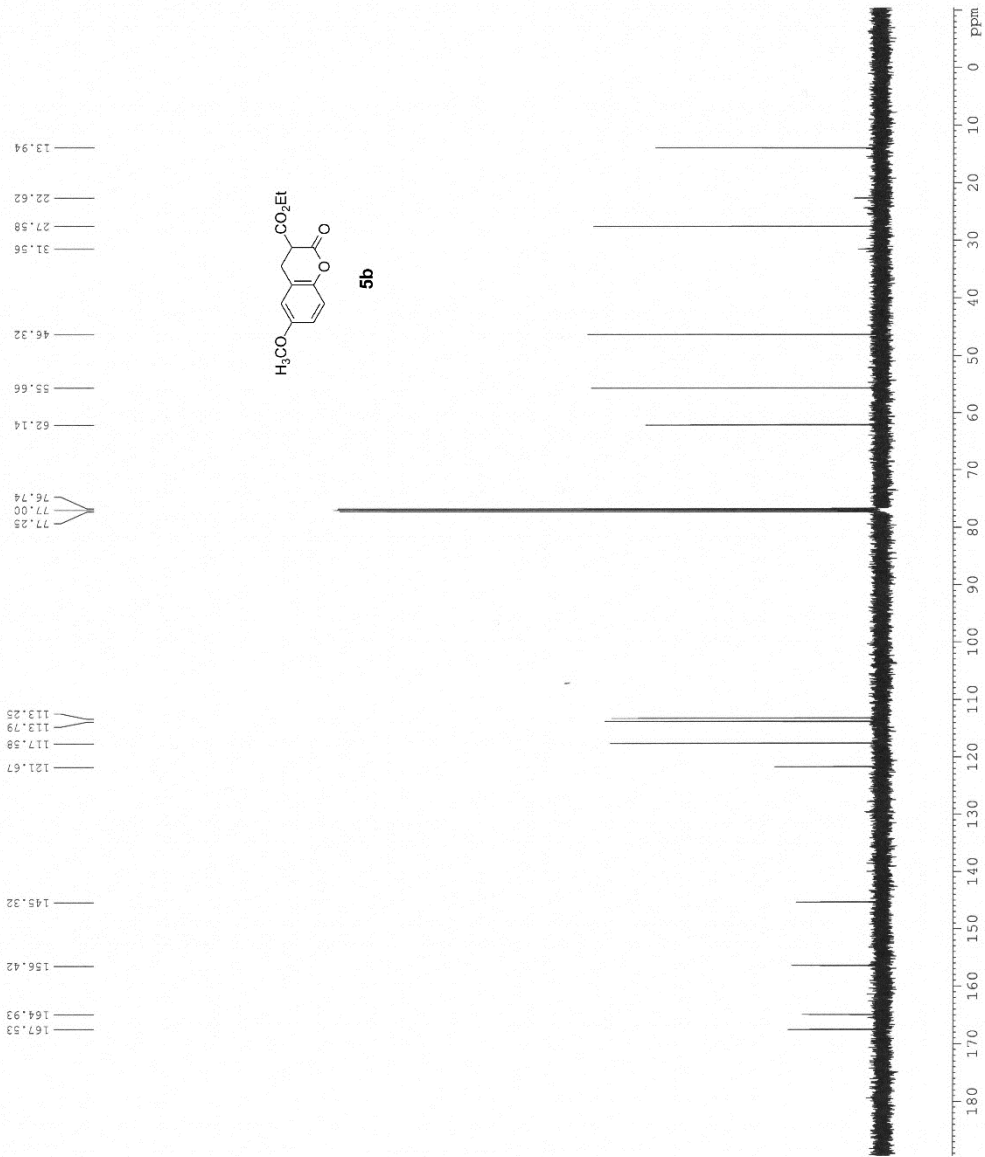

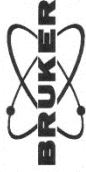

Current Data Parameters  
NAME ZEF137  
EXPNO 2  
PROCNO 1

F2 - Acquisition Parameters  
Date\_ 20140130  
Time 13.48  
INSTRUM DRX  
PROBHD 5 mm TBI LH/13  
PULPROG dept135  
TD 65536  
SOLVENT MeOD  
NS 211  
DS 4  
SWH 30030.029 Hz  
FIDRES 0.458222 Hz  
AQ 1.0912244 sec  
RG 1290.2  
DW 16.650 usec  
DE 6.78 usec  
TE 303.0 K  
CNST2 145.0000000  
D1 2.0000000 sec  
d2 0.00344828 sec  
d12 0.0002000 sec  
DELTA 0.00001783 sec  
TD0 1

===== CHANNEL f1 =====  
NUC1 13C  
P1 14.00 usec  
PL1 28.00 usec  
PL2 -3.00 dB  
SFO1 125.7703643 MHz  
===== CHANNEL f2 =====  
CPDPRG2 waltz16  
NUC2 1H  
P3 9.00 usec  
P4 18.00 usec  
PCPD2 80.00 usec  
PL2 3.00 dB  
PL12 26.00 dB  
SFO2 500.1320005 MHz  
F2 - Processing parameters  
SI 32768  
SF 125.7577939 MHz  
WDW EM  
SSB 0  
LB 1.00 Hz  
GB 0  
PC 1.40

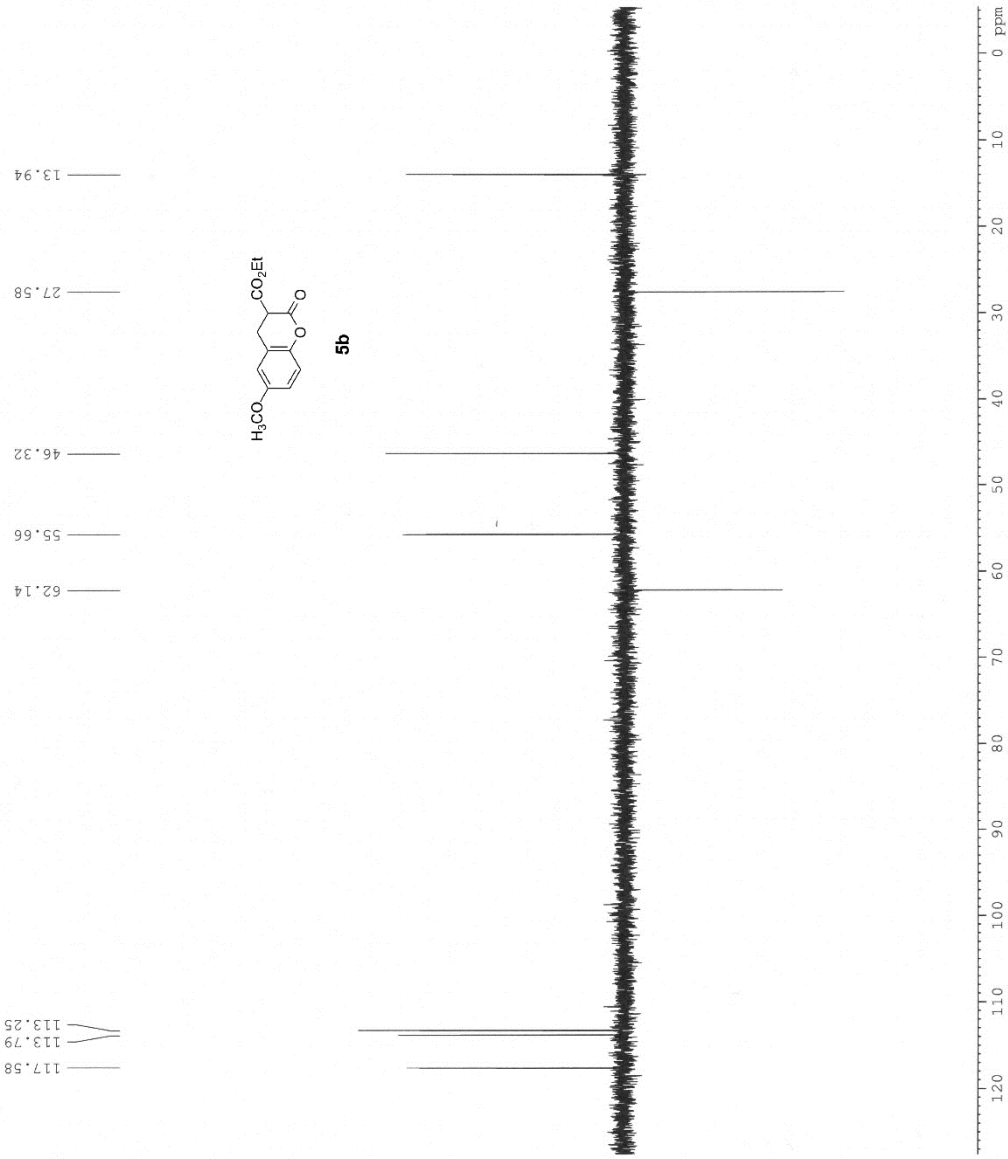

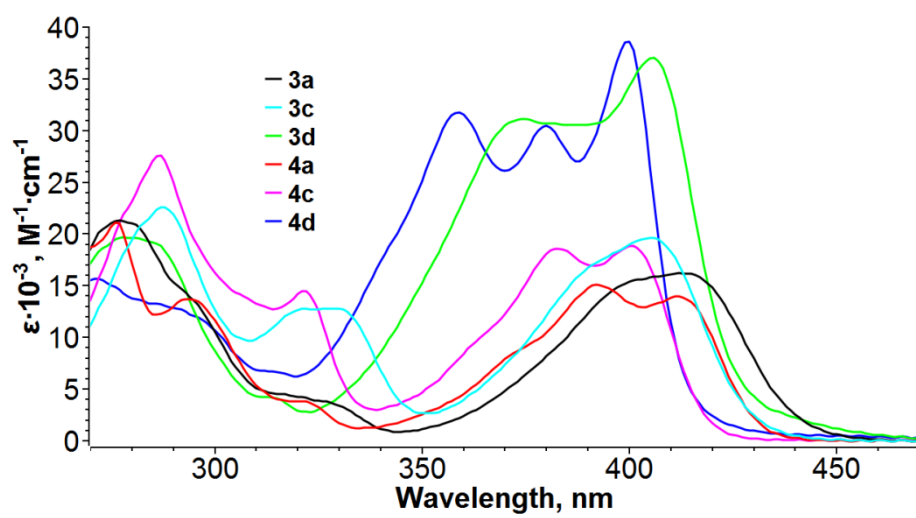

Figure S2. Absorption spectra of compounds **3a**, **3c**, **3d**, **4a**, **4c**, **4d** in DCM.
